# 1 **Jak-Stat pathway induces *Drosophila* follicle elongation by a** 2 **gradient of apical contractility**

3

4 Hervé Alégot, Pierre Pouchin, Olivier Bardot and Vincent Mirouse\*

5 GReD Laboratory, Université Clermont Auvergne, CNRS, INSERM, F-63000 Clermont-  
6 Ferrand, FRANCE

7 \*contact: [vincent.mirouse@udamail.fr](mailto:vincent.mirouse@udamail.fr)

8

9 Abstract

10 Tissue elongation and its control by spatiotemporal signals is a major developmental question.  
11 Currently, it is thought that *Drosophila* ovarian follicular epithelium elongation requires the  
12 planar polarization of the basal domain cytoskeleton and of the extra-cellular matrix,  
13 associated with a dynamic process of rotation around the anteroposterior axis. Here we show,  
14 by careful kinetic analysis of *fat2* mutants, that neither basal planar polarization nor rotation  
15 is required during a first phase of follicle elongation. Conversely, a JAK-STAT signaling gradient  
16 from each follicle pole orients early elongation. JAK-STAT controls apical pulsatile  
17 contractions, and Myosin II activity inhibition affects both pulses and early elongation. Early  
18 elongation is associated with apical constriction at the poles and oriented cell  
19 rearrangements, but without any visible planar cell polarization of the apical domain. Thus, a  
20 morphogen gradient can trigger tissue elongation via a control of cell pulsing and without  
21 planar cell polarity requirement.

22

23 **Impact Statement:**

24 Follicle elongation does not rely solely on the basal side of the cells but also requires a  
25 mechanism integrating a developmental cue with a morphogenetic process involving their  
26 apical domain.

27

28

## 29 **Introduction**

30 Tissue elongation is an essential morphogenetic process that occurs  
31 during the development of almost any organ. Therefore, uncovering the  
32 underlying molecular, cellular and tissue mechanisms is an important  
33 challenge. Schematically, tissue elongation relies on at least three  
34 determinants. First, the elongation axis must be defined by a directional  
35 cue that usually leads to the planar cell polarization (pcp) of the elongating  
36 tissue. Second, a force producing machinery must drive the elongation and  
37 this force can be generated intrinsically by the cells within the elongating  
38 tissue and/or extrinsically by the surrounding tissues. Finally, such force  
39 induces tissue elongation via different cellular behaviors, such as cell  
40 intercalation, cell shape modification, cell migration or oriented cell division.  
41 This is exemplified by germband extension in *Drosophila* embryo where Toll  
42 receptors induce Myosin II planar polarization, which drives cell  
43 rearrangements (Bertet et al 2004; Irvine, & Wieschaus 1994; Blankenship  
44 et al 2006; Paré et al 2014).

45 In the last years, *Drosophila* egg chamber development has emerged  
46 as a powerful model to study tissue elongation (Bilder, & Haigo 2012;  
47 Cetera, & Horne-Badovinac 2015). Each egg chamber (or follicle) consists  
48 of a germline cyst that includes the oocyte, surrounded by the follicular  
49 epithelium (FE), a monolayer of somatic cells. The FE apical domain faces  
50 the germ cells, while the basal domain is in contact with the basement  
51 membrane. Initially, a follicle is a small sphere that progressively elongates  
52 along the anterior-posterior (AP) axis, which becomes 2.5 times longer than  
53 the mediolateral axis (aspect ratio (AR) = 2.5), prefiguring the shape of the

54 fly embryo.

55 All the available data indicate that follicle elongation relies on the FE.  
56 Specifically, along the FE basal domain F-actin filaments and microtubules  
57 become oriented perpendicularly to the follicle AP axis (Gutzeit 1990;  
58 Viktorinová, & Dahmann 2013). The cytoskeleton planar polarization  
59 depends on the atypical cadherin Fat2 via an unknown mechanism  
60 (Viktorinová et al 2009; Viktorinová, & Dahmann 2013; Chen et al 2016).  
61 Fat2 is also required for a dynamic process of collective cell migration of all  
62 the follicle cells around the AP axis until stage 8 of follicle development. This  
63 rotation reinforces F-actin planar polarization and triggers the polarized  
64 deposition of extracellular matrix (ECM) fibrils perpendicular to the AP axis  
65 (Haigo, & Bilder 2011; Lerner et al 2013; Viktorinová, & Dahmann 2013;  
66 Cetera et al 2014; Isabella, & Horne-Badovinac 2016; Aurich, & Dahmann  
67 2016). These fibrils have been proposed to act as a molecular corset,  
68 mechanically constraining follicle growth along the AP axis during follicle  
69 development (Haigo, & Bilder 2011). Additionally, Fat2 is required for the  
70 establishment of a gradient of basement membrane (BM) stiffness at both  
71 poles at stage 7-8 (Crest et al 2017). This gradient also depends on the  
72 morphogen-like activity of the JAK-STAT pathway and softer BM near the  
73 poles would allow anisotropic tissue expansion along the A-P axis (Crest et  
74 al 2017). After the end of follicle rotation, F-actin remains polarized in the  
75 AP plane during stage 9 to 11 and follicular cells (FCs) undergo oriented  
76 basal oscillations that are generated by the contractile activity of stress  
77 fibers attached to the basement membrane ECM via integrins ((Bateman et  
78 al 2001; Delon, & Brown 2009; He et al 2010).

79           Nonetheless, in agreement with recently published observations, we  
80 noticed that a first phase of follicle elongation does not require *fat2* and the  
81 planar polarization of the basal domain (Aurich, & Dahmann 2016). We  
82 therefore focused on this phase, addressing the main three questions which  
83 are how the follicle elongation axis is defined, what is the molecular motor  
84 triggering elongation in a specific axis, and how FCs behave during this  
85 phase.

## 86 **Results**

### 87 **Polar cells define the axis of early elongation**

88 We analyzed the follicle elongation kinetics in *fat2*<sup>58D</sup> mutants, which block  
89 rotation and show a strong round egg phenotype. Follicle elongation is  
90 normal in *fat2* mutants during the first stages (3 to 7) with an AR of 1.6  
91 (Fig 1a-d). Thus, at least two mechanistically distinct elongation phases  
92 control follicle elongation, a first phase (stage 3 to 7) independent of *fat2*,  
93 rotation and ECM basal polarization, and a later one (stage 8 to 14) that  
94 requires *fat2*. This observation is consistent with the absence of elongation  
95 defect of clonal loss-of-function of *vkg* before stage 7-8 (Bilder and Haigo,  
96 2011).

97 To try to identify the mechanism regulating the early phase of follicle  
98 elongation, we first analyzed trans-heterozygous *Pak* mutant follicles, which  
99 never elongate (Conder et al 2007) (fig. 1e). The *Pak* gene encodes a Pak  
100 family serine/threonine kinase that localizes at the FE basal domain. *Pak*  
101 mutants also show many other abnormalities, such as the presence of more  
102 than one germline cyst and abnormal interfollicular filaments ((Vlachos et  
103 al 2015) and not shown). Interfollicular cells derive from prepolar cells that

104 also give rise to the polar cells, which prompted us to analyze distribution  
105 of the latter using the specific marker FasIII (Bastock, & St Johnston 2008;  
106 Horne-Badovinac, & Bilder 2005). Polar cells are pairs of cells that  
107 differentiate very early and are initially required for germline cyst  
108 encapsulation (Grammont, & Irvine 2001). They also play the role of an  
109 organizing center for the differentiation of FC sub-populations during mid-  
110 oogenesis (Xi et al 2003). In WT follicles, polar cells are localized at the  
111 follicle AP axis extremities (Fig 1b). Conversely, in *Pak* mutants, we  
112 observed a single polar cell cluster or two clusters close to each other (Fig  
113 1e). This suggests that *Pak* is required for polar cell positioning, though a  
114 role in their specification or survival cannot be excluded, which in turn could  
115 play a role in defining the elongation axis. Some dominant suppressors of  
116 the *Pak* elongation defect have been identified, including PDGF- and VEGF-  
117 receptor related (*Pvr*), although the reason for this suppression is unknown  
118 (Vlachos, & Harden 2011). By using flies heterozygous for a *Pvr* allele and  
119 mutant for *Pak*, we observed that normal positioning of polar cells is  
120 frequently but not always restored (Fig 1f and 1S1c). We quantitatively  
121 compared the elongation of those two situations, normal or abnormal polar  
122 cells, by plotting the long axis as a function of the short axis for  
123 previtellogenic stages (before stage 8) and determined the corresponding  
124 regression line (Fig 1S1d). We defined an elongation coefficient that  
125 corresponds to the slope of this line and for which a value of 1 means no  
126 elongation. This method allows to quantify elongation independently of any  
127 bias that could be introduced by stage determination approximation due to  
128 aberrant follicle shape or differentiation. Moreover, focusing on

129 previtellogenic stages allows excluding genotypes that affect only the late  
130 elongation phase. It is exemplified with *fat2* mutant that does not induce  
131 significant defects if we include only stage 3 to 7 follicles (previtellogenic),  
132 but does show a difference if we include stage 8 (Fig 1S1a,b). The statistical  
133 comparison of the elongation coefficients clearly shows that restoring polar  
134 cell position by removing one copy of *Pvr* in *Pak* mutants strongly rescues  
135 follicle elongation (Fig 1g and 1S1c,d).

136 Although it has not been fully demonstrated in this context, Pak often works  
137 as part of the integrin signaling network and mosaic follicles containing FC  
138 clones mutant for *mysospheroid* (*mys*), which encodes the main fly  $\beta$ -  
139 integrin subunit, also show a round follicle phenotype at early stages  
140 (Haigo, & Bilder 2011). We noticed that in some follicles containing *mys*  
141 mutant clones, polar cells are mispositioned, a defect generally observed  
142 when at least one polar cell is mutant. As in *Pak* mutants, the two polar cell  
143 clusters are not diametrically opposed (Fig 1S1e), or a single cluster is  
144 observed (Fig 1i, movie S1). Importantly, the polar cell positioning defect  
145 is associated with the round follicle phenotype (Fig 1j, and 1S1f).  
146 Conversely, in mosaic follicles in which polar cell positioning was not  
147 affected, the round egg phenotype is never observed at early stages, even  
148 with large mutant clones (Fig 1h and 1S1f, movie S2). In agreement, the  
149 elongation coefficient of the latter cases is much higher than the ones with  
150 abnormal polar cells (Fig 1j). Thus, together, these results indicate that *pak*  
151 and *mys* mutants are not required for the early phase of elongation once  
152 polar cells are well-placed and thus affect this phase indirectly. They also

153 strongly suggest that polar cells are required to define the follicle elongation  
154 axis.

155

### 156 **A JAK-STAT gradient from the poles is the cue for early elongation**

157 Once the follicle is formed, polar cells are important for the differentiation  
158 of the surrounding FCs. From stage 9 of oogenesis, FCs change their  
159 morphology upon activation by Unpaired (Upd), a ligand for the JAK-STAT  
160 pathway, exclusively produced by polar cells throughout oogenesis (Silver,  
161 & Montell 2001; Xi et al 2003; McGregor et al 2002). To identify the FCs in  
162 which the JAK-STAT pathway is active, we used a reporter construct in  
163 which GFP transgene expression is controlled by STAT binding repeat  
164 elements in the promoter (Bach et al 2007). During the early stages of  
165 oogenesis, the pathway is active in all the main body FCs (Fig 2b).  
166 Moreover, we observed differences in GFP expression level (and thus STAT  
167 activity) between the poles and the mediolateral region, starting at about  
168 stage 3, concomitantly with the beginning of elongation (Fig 2b,h). At later  
169 stages (5 to 7), it leads to the formation of a gradient of STAT activity, as  
170 indicated by the strong GFP expression at each pole and the very weak or  
171 no signal in the large mediolateral part of each follicle (Fig 2b,h, and 2S1a).  
172 Thus, the spatiotemporal pattern of JAK-STAT activation is consistent with  
173 a potential role of this pathway in follicle elongation.

174 The key role of JAK-STAT signaling during follicle formation precluded the  
175 analysis of elongation defects in large null mutant clones (McGregor et al  
176 2002). Therefore, we knocked-down by RNAi the ligand *upd* and the most  
177 downstream element of the cascade, the transcription factor *Stat92E*, both

178 efficiently decreasing the activity of the pathway in the follicular epithelium  
179 (Fig 2a,c,d,g and 2S1). *Upd* knock-down was performed either using  
180 *upd:Gal4* that is specifically expressed in the polar cells (Khammari et al  
181 2011), or *tj:Gal4* expressed in all FCs, and then analyzed only follicles that  
182 contained one germline cyst and correctly placed polar cells. At early stages,  
183 with both drivers, such follicles are significantly rounder than control  
184 follicles (Fig 2a,c,g and 2S1e). It indicates a role for JAK-STAT pathway in  
185 early elongation and confirms the causal link between polar cells and early  
186 elongation. Moreover, knock-down of *Stat92E* using a driver specifically  
187 expressed at the poles (*Fru:Gal4*) also affects early elongation (Fig 2d,g,  
188 and 2S1e), suggesting a transcriptional control of elongation by JAK-STAT  
189 (Borensztein et al 2013). These results are the first examples of loss of  
190 function with an effect only on early elongation independent of polar cells  
191 position, and indicate that *Upd* secreted by the polar cells and JAK-STAT  
192 activation in FCs are both required for follicle elongation. Moreover, clonal  
193 ectopic *upd* overexpression completely blocks follicle elongation, without  
194 affecting polar cell positioning (Fig 2e), demonstrating that *Upd* is not only  
195 a prerequisite for the elongation but the signal that defines its axis ( $n =$   
196 20). Similarly, general expression of *Hop<sup>Tum</sup>*, a gain of function mutation of  
197 fly JAK, disrupting the pattern of JAK-SAT activation, also affects follicle  
198 elongation (Fig 2f,g, and 2S1e). Thus, the spatial control of the JAK-STAT  
199 pathway activation is required for follicle elongation. Altogether, these  
200 results show that *Upd* secretion by polar cells and the subsequent gradient

201 of JAK-STAT activation act as a developmental cue to define the follicle  
202 elongation axis during the early stages of oogenesis.

203

#### 204 **MyosinII activity drives apical pulses and early elongation**

205 Once the signal for elongation identified, we aimed to determine the  
206 molecular motor driving this elongation, which in many morphogenetic  
207 contexts is MyosinII (MyoII)(Heisenberg, & Bellaïche 2013; Lecuit et al  
208 2011). The knock-down in all FCs of *spaghetti squash (sqh)*, the MyoII  
209 regulatory subunit, leads to a significant decrease in the elongation  
210 coefficient and follicle AR from stage 4 (Fig 3a-b and 3S1b c) indicating that  
211 MyoII is the motor of early elongation. We have shown that the rotation  
212 and the planar polarization of the basal actomyosin is not involved in early  
213 elongation. Moreover, at these stages, MyoII is strongly enriched at the  
214 apical cortex suggesting that its main activity is on this domain of the FCs  
215 (Fig 3S1a and 5c) (Wang, & Riechmann 2007). We therefore looked at  
216 MyoII on living follicles focusing on the apical side and found that it is highly  
217 dynamic (movie S3). In *Drosophila*, transitory medio-apical recruitment of  
218 actomyosin usually drives apical pulses (Martin et al 2009, Martin, &  
219 Goldstein 2014). Accordingly, using a GFP trap line for Bazooka (Baz-GFP),  
220 which concentrates at the *zonula adherens* and marks the periphery of the  
221 apical domain, we observed that the transient accumulation of MyoII is  
222 associated with a contraction of this domain, followed by a relaxation when  
223 MyoII signal decreases (Fig 3c-e, Movie S4). Although we did not find a  
224 clear period because cells can pause for a variable time between two  
225 contractions, the approximate duration of a pulse was about three minutes.

226 Cross correlation analysis on many cells from several follicles (n=86)  
227 confirms the association between MyoII and pulses and reveals that Sqh  
228 accumulation slightly precedes the reduction of the apical surface, arguing  
229 that it is the motor responsible for these contractions (Fig 3f). Inhibiting  
230 Rho kinase (rok) activity, the main regulator of MyoII, using Y-27632,  
231 reduces follicle cells surface variation by ~30% (Fig 3g). Thus, MyoII drives  
232 apical pulsing during early stages. Consequently, we asked whether and  
233 how apical pulses could induce elongation. From stage 9, basal pulses,  
234 which are important for the second phase of elongation, have been shown  
235 to be anisotropic (He et al 2010). However, quantification of axis length  
236 variations showed that the apical pulses were isotropic, both in the  
237 mediolateral and polar regions (Fig 3h). Tissue elongation is often  
238 associated with tissue planar cell polarization, we therefore investigated  
239 whether Myosin II and Baz showed exclusive cortical planar polarization, as  
240 demonstrated for instance during germband extension (Bertet et al 2004;  
241 Zallen, & Wieschaus 2004). Consistent with the isotropic nature of the  
242 pulses, we failed to detect any oriented enrichment of these proteins,  
243 indicating the absence of noticeable apical planar cell polarization of the  
244 motor generating early elongation (Fig 3i,j). Altogether, these data indicate  
245 that MyoII induces apical pulses and early elongation. Nonetheless, neither

246 the isotropic nature of the pulses nor MyoII localization explains how the  
247 pulses could induce elongation.

248

### 249 **JAK-STAT induces a gradient of apical pulses**

250 Our previous results suggest that pulses do not provide an explanation for  
251 elongation at a local cellular scale and we therefore analyzed their  
252 spatiotemporal distribution at the tissue scale to determine whether they  
253 present a specific tissue pattern. Based on the JAK-STAT activity gradient  
254 we hypothesized that cells in the mediolateral part of the follicles should  
255 progressively change their behavior during follicle growth. We therefore  
256 monitored the mediolateral region of stage 3 and 7 follicles. At stage 3, cells  
257 undergo contractions and relaxations asynchronously (Fig 4a, Movie S5). At  
258 stage 7, cells were much less active (Fig 4c, Movie S6). This difference was  
259 confirmed by monitoring the variation of the relative apical surface of  
260 individual cells (Fig 4e) or a whole population (Fig 4f) (40% of mean  
261 variation at stage 3 and only about 15% in the equatorial part at stage 7).  
262 Quantification of the average variation of the apical cell surface in a series  
263 of follicles indicates that the pulsing amplitude gradually decreases in  
264 mediolateral from stage 3 to stage 8 (Fig 4S1a). This correlation between  
265 JAK-STAT activity and pulsing activity in the mediolateral region prompted  
266 us to develop a method to visualize the poles of living follicles, which has  
267 never been done before (see methods). We managed to image the poles of  
268 stage 3 to 4 and stage 7 to 8 follicles and in both cases the pulse activity is  
269 high (Fig 4b,d-f, Movie S7, S8). Finally, the analysis of slightly tilted stage  
270 7 to 8 follicles clearly revealed a gradient of pulse intensity emanating from

271 the pole (Fig 4g and 4S1b). Thus, pulse intensity distribution is similar in  
272 space and time to the JAK-STAT activity gradient. Moreover, the cell pulse  
273 amplitude is significantly reduced in the mediolateral region of stage 3-4  
274 and near the poles of stage 7-8 *upd* RNAi follicles (Fig 4h,i, Movie S9, S10),  
275 indicating that JAK-STAT regulates FC apical pulsatory activity. Finally, we  
276 found that clonal ectopic activation of JAK is sufficient to increase pulse  
277 intensity in the mediolateral region of stage 7 to 8 follicles compared to  
278 similar control clones (Fig 4j, movies S11 and S12). Together, these results  
279 show that JAK-STAT pathway has an instructive role in controlling the  
280 intensity of FC apical pulses, leading to a specific spatiotemporal pattern  
281 breaking follicle symmetry in each hemisphere.

282

### 283 **Myosin II is required at the poles but is not controlled by JAK-STAT**

284 Since JAK-STAT pathway and MyoII are both important for apical pulses,  
285 we studied their functional relationship. The apical level of the Myosin II  
286 active form, visualized by its phosphorylation, is significantly reduced by  
287 18% in *STAT92E* null mutant clones on young follicles, compared to WT  
288 surrounding cells (n=17 clones,  $p < 0,001$ ), which may suggest that MyoII  
289 activity is regulated by JAK-STAT signaling (Fig 5a). However, clonal gain  
290 of function of JAK in the region where the JAK-STAT pathway is normally  
291 inactive (mediolateral at stage 7-8) does not increase the apical  
292 phosphorylation level of MyoII (Fig 5b). Moreover, analysis of the global  
293 pattern of apical MyoII phosphorylation does not reveal any gradient  
294 between poles and mediolateral regions (Fig 5c,d). Altogether these data  
295 indicate that MyoII activation by phosphorylation is independent of JAK-

296 STAT signaling and that JAK-STAT regulates pulses by another means,  
297 which might be required for efficient apical recruitment of MyoII. Thus,  
298 although JAK-STAT and Myosin II are both required for early elongation,  
299 they control pulses in parallel.

300 If the gradient of apical pulses induces early elongation and explains MyoII  
301 involvement in this process, then MyoII function should be required at the  
302 poles. We generated mutant clones for a null allele of *sqh* to analyze where  
303 MyoII is required for elongation. As previously shown (Wang, & Riechmann  
304 2007), such clones reach a limited size, probably explaining why it is rare  
305 to obtain a clone that covers poles, especially after stage 5. We focused on  
306 clones covering the anterior pole. To quantify the effect of mutant clones  
307 on semi-follicles, we measured each semi-follicle extrapolated Aspect Ratio  
308 (eAR), which means, the ratio of the corresponding full ellipse (see methods  
309 and Fig 5S1). For WT follicle, anterior eAR is equal or superior to posterior  
310 eAR, as the anterior pole is normally more pointed than the posterior (Fig  
311 5f). Analysis of the eAR of the poles containing such mutant clones indicates  
312 that Myosin II loss of function specifically affects the elongation of this pole,  
313 compared to the opposite WT posterior poles (n=10) (Fig 5e,h). Moreover,  
314 we never observed clones in the mediolateral regions inducing elongation  
315 defects (n=35) (Fig 5g). Finally, we also performed similar experiment with  
316 *Rok* null mutant clones. Such clones have a weaker effect on cell  
317 morphology (Fig 5i and Wang, & Riechmann 2007), but still affect  
318 elongation when situated at the pole (Fig 5e,i). Thus, MyoII and Rok are  
319 required specifically at the poles to induce early elongation. These results

320 strongly argue for the gradient of apical isotropic FC pulses as the force-  
321 generating mechanism that drives early elongation.

322

323 **Early elongation is associated with cell constriction and cell**  
324 **intercalation**

325 Independently of the upstream events, we asked which cellular behavior  
326 was associated with early elongation. The simplest possibility would be that  
327 cells are stretched along the AP axis. However, cells are actually slightly  
328 elongated perpendicularly to the axis of elongation and this morphology did  
329 not change significantly over time, indicating that this parameter does not  
330 contribute to follicle elongation during early stages (Fig 6S1a,b). Tissue  
331 elongation can be also associated with oriented cell divisions. A movie of  
332 mitosis in the FE showed that this orientation is really variable through the  
333 different steps of mitosis (Fig 6S1c). We therefore quantified the orientation  
334 of cytokinesis figures, which did not highlight any bias towards the AP axis  
335 (Fig 6S1d). Finally, we asked whether early elongation could be associated  
336 with cell intercalation. Analysis of fluorescence video-microscopy images  
337 gave inconclusive results because such events are probably rare and slow  
338 and follicle rotation precludes their reproducible observation (Movie S13).  
339 We used therefore an indirect method. As from stage 6 follicle cells stop  
340 dividing and their number remains constant, we counted the number of cells  
341 in the longest line of the AP axis (i.e., the follicle plane that includes the  
342 polar cells). This number significantly increases between stage 6 and 8,  
343 showing that cells intercalate in this line (Fig 6a-d). This number was also  
344 correlated with the follicle AR (Fig 6e), indicating that follicle early

345 elongation is associated with cell intercalation along the AP axis. Cell  
346 intercalation can be powered at a cellular scale by the polarized enrichment  
347 of Myosin II in the cells that rearrange their junctions (Bertet et al 2004).  
348 However, we have already shown that MyoII does not show such a pattern  
349 in FCs (Fig 3i,j). Alternatively, intercalation can be promoted at a tissue  
350 scale. For instance, apical cell constriction in the wing hinge induces cell  
351 intercalations in the pupal wing (Aigouy et al 2010). We observed that the  
352 cell apical surface is lower at the poles than in more equatorial cells, and  
353 that this difference increases during early elongation phase (Fig 6f,g,h).  
354 Such difference could be explained by cell shape changes or a differential  
355 cell growth. Cell height is significantly larger at the poles, indicating that  
356 the changes in apical surface are linked to cell morphology, as previously  
357 shown for instance during mesoderm invagination (Fig 6i) (He et al 2014).  
358 However, cells at the poles have a lower volume than in the mediolateral  
359 region at stage 7 (Fig 6S1e). This difference of volume is nonetheless  
360 proportionally weaker than the change in apical surface, suggesting the cell  
361 shape changes induce the reduction of volume rather than the opposite.  
362 Thus, early elongation is associated with a moderate cell constriction in the  
363 polar regions. *sqh* mutant FCs are stretched by the tension coming from  
364 germline growth, a defect opposite to cell constriction (Fig 5g,h)(Wang, &  
365 Riechmann 2007). Interestingly, FCs mutant for *Stat92E* are also flattened,  
366 with a larger surface and a lower height, compared to WT surrounding cells  
367 (Fig 6j-m). Moreover, the apical cell surface at the poles of stages 7-8 is  
368 increased by the loss of function of *Upd* (fig 6h). Hence, these results link  
369 JAK-STAT and the morphology of the follicle cells in a coherent manner with

370 an involvement of apical pulses for the cell constriction observed at the  
371 poles.

372 Thus, altogether these results indicate that two cell behaviors occur during  
373 the early phase of elongation: oriented cell intercalation towards the A-P  
374 axis and apical cell constriction at the poles.

## 375 **Discussion**

376 The first main conclusion of this work is that follicle elongation can be  
377 subdivided in at least two main temporal and mechanistic phases: an early  
378 one (stage 3 to 7) that is independent of Fat2, rotation and ECM and F-actin  
379 basal polarization, and a second one (stage 8 to 14) that requires Fat2. This  
380 is reminiscent of germband extension where different elongation  
381 mechanisms have been described (Lye et al 2015; Collinet et al 2015; Rauzi  
382 et al 2010; Blankenship et al 2006; Sun et al 2017). In the case of the  
383 follicle, it is still not clear how overlapping and interconnected these  
384 different mechanisms are.

385 Fat2 has no role in early elongation. Nevertheless, Fat2 is required as  
386 early as the germarium for the correct planar polarization of the microtubule  
387 cytoskeleton and for follicle rotation, that takes place during the early  
388 elongation phase (Viktorinová, & Dahmann 2013, Chen et al 2016). The  
389 rotation reinforces the basal pcp of the F-actin during stages 4 to 6, and  
390 thus likely participates to the late phase in this way (Cetera et al 2014;  
391 Aurich, & Dahmann 2016). Rotation is also necessary for the ECM fibrils  
392 deposition, though, their specific role in elongation has not been clearly  
393 elucidated yet. Another mechanism participating to elongation is the ECM  
394 stiffness gradient (Crest *et al*, 2017). However, its contribution begins only

395 at stage 7-8, in agreement with the fact that it depends on Fat2 and that  
396 *vkg* (ColIV) loss of function follicles elongate correctly up to stage 8,  
397 showing that the ECM is required only in the second elongation phase (Crest  
398 et al 2017; Haigo, & Bilder 2011). Thus, the setting up of the elements  
399 required for this second elongation phase fully overlaps with the first  
400 elongation phase, but these two phases are so far unrelated at the  
401 mechanistic level. Notably, the early elongation phase requires elements of  
402 the apical side of follicle cells, whereas the second phase involves the basal  
403 side. Mirroring our observations, a recent report nicely shows that the fly  
404 germband extension, which was thought to depend exclusively on the apical  
405 domain of the cells, also involves their basal domain (Sun et al 2017). Since  
406 both Fat2 and the gradient of BM stiffness are involved in the elongation at  
407 stage 8 and that apical pulses are still observed at this stage, it suggests  
408 that apical and basal domain contributions may slightly overlap. Moreover,  
409 both the gradients of apical pulses and of BM stiffness are under the control  
410 of JAK-STAT, indicating that this pathway has a pleiotropic effect on follicle  
411 elongation.

412 We have also shown that integrin and Pak contribute to early  
413 elongation in an indirect manner through their impact on the positioning,  
414 the differentiation or the survival of the polar cells. In this respect, *Pak* and  
415 *mys* mutants belong to a new phenotypic class that could also comprise the  
416 Laminin  $\beta$ 1 subunit (LanB1) and the receptor-like tyrosine phosphatase Lar  
417 (Díaz de la Loza et al 2017; Frydman, & Spradling 2001). It is yet unknown  
418 how the A-P position of those cells is established and maintained.  
419 Interestingly, *Pak* mutants have also an altered germarium structure

420 leading to abnormal follicle budding, suggesting that polar cell  
421 mispositioning might be linked to this primary defect (Vlachos et al 2015).  
422 However, it is worth noticing that *Pak* mutant follicles do not elongate at  
423 all, whereas they still have a cluster of polar cells. Thus, *Pak* might be also  
424 required for early elongation in a more direct manner than polar cell  
425 positioning, downstream or in parallel to JAK-STAT pathway, but  
426 independently of basal planar polarization.

427 We found that polar cells define the elongation axis of each follicle  
428 during early elongation by secreting the Upd morphogen and forming a  
429 gradient from each pole, which in turn induces apical pulses. The isotropic  
430 nature of these pulses does not provide an evident link with tissue  
431 elongation, unlike the oriented basal pulses going on in later stages (He et  
432 al 2010). Moreover, the absence of planar polarization of MyoII in apical,  
433 the driving force of early elongation, and the non-requirement for “basal  
434 pcp” strongly argues against a control of this elongation phase via a planar  
435 cell polarity working at a local scale. Rather, several strong arguments allow  
436 proposing that the early elongation relies on pulses working at a tissue scale  
437 (Fig 6n). First, the pulses are distributed in a gradient from the poles,  
438 suggesting that this distribution can orient the elongation in each  
439 hemisphere. Also, our data indicate that JAK-STAT does not directly  
440 regulate MyoII activity, and, thus, they likely work in parallel to control  
441 pulses. The convergence of requirement of JAK-STAT and myosin II for both  
442 pulses and early elongation argues for a causal link between these two  
443 processes. To date, JAK-STAT has no other known morphogenetic function  
444 before stage 8. Similarly, the only other known function of MyoII is linked

445 to the rotation, which is not involved in early elongation, and MyoII is very  
446 concentrated at the apical cortex, emphasizing the role of this domain.  
447 Moreover, though present all around the follicle, MyoII is required for early  
448 elongation at the poles. Thus, the apical localization and the spatiotemporal  
449 requirement of MyoII are coherent with the apical pulses acting as the  
450 driving force for early elongation.

451 JAK-STAT has been already involved in the elongation of different  
452 tissues in flies and in vertebrates. For instance, Upd works as the elongation  
453 cue for the hindgut during fly embryogenesis, a process also associated with  
454 cell intercalation, though the underlying mechanism is unknown (Johansen  
455 et al 2003). Maybe more significantly, JAK-STAT is involved in the  
456 extension-convergence mechanism during zebrafish gastrulation  
457 (Yamashita et al 2002). Moreover, JAK-STAT also participates in other  
458 morphogenetic events, such as tissue folding in the fly gut and wing disc  
459 (Wells et al 2013). All these roles are potentially linked to a control of apical  
460 cell pulses. Since our results indicate that this control is not through MyoII  
461 activation, identifying the transcriptional targets of STAT explaining its  
462 impact on apical actomyosin will be relevant for many developmental  
463 contexts.

464 How the apical pulses precisely drive early elongation remains a  
465 question that will require further investigations. Nonetheless, we  
466 determined that early elongation is associated with apical cell constriction  
467 close to the poles and oriented cell intercalations. Cell constriction is likely  
468 a direct consequence of apical pulses, as it has been shown in many other  
469 contexts, because both myosin II and JAK-STAT loss of function affect pulse

470 and induce an increase of the apical surface (Wang, & Riechmann 2007;  
471 Martin, & Goldstein 2014). Thus, as during tissue invagination, cell  
472 constriction may accentuate the curvature at the poles and thus promote  
473 elongation. Intercalation can be induced at a tissue scale by long range  
474 anisotropic tensions in the tissue, as exemplified by pupal wing  
475 development or mammalian limb bud ectoderm (Aigouy et al 2010; Lau et  
476 al 2015). In the wing, elongation is due to contraction of the hinge, which  
477 corresponds to an apical constriction of the cells. Here, the apical pulses  
478 could act in a similar way via the constriction, acting as a pulling force at  
479 each pole. Thus, intercalations may correspond to a passive response  
480 bringing plasticity to the tissue, hence stabilizing its elongation. Although  
481 the respective contribution of these two cell behaviors - apical constriction  
482 at the poles and cell intercalation along the AP axis – and their potential  
483 links remain to be determined, together they likely recapitulate at the  
484 cellular scale the elongation observed at the tissue scale. Importantly, such  
485 a mechanism does not require any planar cell polarization, in agreement  
486 with our observations. To our knowledge, vertebrate AP axis elongation,  
487 which relies on a gradient of randomly oriented cell migration, is the only  
488 other example of tissue elongation instructed by a signaling cue and  
489 independent of planar cell polarization (Bénazéraf et al 2010). Our work  
490 proposes an alternative mechanism explaining how a morphogen gradient  
491 can induce elongation solely through transcription activation, and without

492 any requirement for a polarization of receiving cells. This simple mechanism  
493 may apply to other tissues and other morphogens.

494

495

496 **Methods**

497 **Genetics**

498 All the fly stocks with their origin and reference are described in  
499 supplementary file 1A.

500 The detailed genotypes, temperature and heat-shock conditions are given  
501 in supplementary file 1B.

502 **Immunostaining and imaging**

503 Dissection and immunostaining were performed as described previously  
504 (Vachias et al 2014) with the following exceptions: ovaries were dissected  
505 in Supplemented Schneider, each ovarioles were separated before fixation  
506 to obtained undistorted follicles. Primary antibodies were against pMyoII  
507 (1/100, Cell Signaling #3675), DE-Cad (1/100, DHSB #DCAD2), Dlg (1/200  
508 DHSB #4F3), FasIII (1/200, DHSB #7G10). Images were taken using a  
509 Leica SP5 or SP8 confocal microscope. Stage determination was done using  
510 unambiguous reference criteria, which are independent of follicle shape  
511 (Spradling, 1993).

512 For live imaging, ovaries were dissected as described previously (Prasad et  
513 al 2007) with the following exceptions: each ovariole was separated on a  
514 microscope slide in a drop of medium and transferred into a micro-well  
515 (Ibidi BioValey©) with a final insulin concentration of 20µg/ml. Samples  
516 were cultured for less than 2 hours before imaging with a Leica SP8 confocal  
517 using a resonant scanner. Follicles were incubated with Y-27632 (Sigma)  
518 (diluted in PBS to 250 µM) for 10 to 30 minutes before image acquisition.  
519 To image the poles, glass beads were added in the well to form a monolayer  
520 (Sigma-Aldrich, G4649 for stage 6 to 8 or G1145 for earlier stages).

521 Ovarioles were added on top of the beads and follicles falling vertically  
522 between the beads were imaged.

523 Cell pulse analysis was performed using the Imaris software and a MATLAB  
524 homemade script to segment and measure the cell surface on maximum  
525 intensity projections of 40 stacks taken every 15 seconds. The intensity of  
526 one cell pulsation corresponds to: (maximum surface of the cell – min  
527 surface)/(mean surface). The isotropy of one cell pulse is measured by  
528 dividing the AP and ML bounding box (best fit rectangle) axis length at cell  
529 maximal area by the AP and MP bounding box axis length respectively at  
530 cell's minimal area. For each follicle, at least 10 cells were analyzed. For  
531 visualization (images presented in Fig 4a,c,d and the attached movies), the  
532 original files were deconvolved, but all the analyses were done using the  
533 raw files.

534 The Fiji software was used to measure the length of the long and short axis  
535 of each follicle on the transmitted light channel, and then to determine the  
536 aspect ratio in WT and mutant follicles. Cells in the longest line of the AP  
537 axis were counted manually using Fiji on the DNA and DE-Cadherin  
538 channels. Bazooka-GFP and MyosinII-mCherry enrichment were analyzed  
539 using the Packing Analyser software (Aigouy et al 2010). Cells were semi-  
540 automatically segmented based on the Baz-GFP channel that was used as  
541 common pattern to calculate the intensity of each bond for both channels.  
542 Fiji was used to measure the intensity of the pSqh signal and 10XStatGFP  
543 signal. A 15-pixel wide line was drawn using the freehand tool, either within  
544 the cells (10X StatGFP), or at the apical level of the cells (pSqh), from the  
545 anterior to the posterior of cross section images of follicles.

546 The extrapolated aspect ratio (eAR) was estimated for each pole by  
547 measuring the width of the follicle at 25% of its total length: for any given  
548 ellipse, this value corresponds to  $\sqrt{3}/2$  times its total width. Therefore, this  
549 measure allows, for each pole, to extrapolate a width and an aspect ratio.  
550 Based on Dlg staining, follicles with gaps in the epithelium were excluded.  
551 To measure cell elongation, images of DE-Cadherin-GFP expressing follicles  
552 were semi-automatically segmented using the Packing Analyser software  
553 and for each follicle the elongation tensor was calculated. The elongation  
554 tensor was defined by the mean elongation of all the segmented cells  
555 (elongation magnitude) and the mean orientation.  
556 The rose diagrams were generated with Packing Analyser; each bin  
557 represents a  $10^\circ$  range and the bin size is proportional to the number of  
558 acquired data. Cell volume was obtained by the multiplication of the mean  
559 surface and the mean height of the cells.  
560 Figures were assembled using ScientiFig (Aigouy, & Mirouse 2013).

### 561 **Statistical analysis**

562 For all experiments, sample size is indicated in the figure legends or in  
563 supplementary file 1B. No statistical method was used to predetermine  
564 sample size. Results were obtained from at least two independent  
565 experiments, and for each experiment multiple females were dissected. No  
566 randomization or blinding were performed. For each experimental condition  
567 variance was low. Matlab software has been used to make analysis of  
568 covariance to determine the elongation coefficient and a multiple pairwise  
569 comparison test has been run to determine the p-value between different  
570 conditions (*aoctool* and *multicompare*, Statistic and Machine Learning

571 Toolbox). The normality of the samples has been calculated using a  
572 D'Agostino & Pearson normality test. Unpaired t-test has been used to  
573 compared samples having a normal distribution. Unpaired Mann-Whitney  
574 test has been used to compared samples having non normal distribution.  
575 For comparison of eAR of anterior and posterior poles, a two-way ANOVA  
576 test with repeated measures was conducted on both poles and for two  
577 genotypes. The post-hoc analysis (two pair-wise Bonferroni tests) was  
578 performed. When shown, error bars represent s.d. For all figures  $p < 0.01$ ,  
579  $** < 0.005$ ,  $*** < 0.001$ .

580

581

## 582 **Acknowledgements**

583 We thank R Basto, M Crozatier, C Dahmann, M Grammont, D Harrison, A-  
584 M Pret and E Wieschaus for fly stocks or reagents. This work was funded by  
585 the ATIP-Avenir program, Association pour la Recherche contre le Cancer  
586 (ARC) and the Auvergne Region. We also thank the confocal imaging facility  
587 of Clermont-Ferrand (ICCF), and team members for comments on the  
588 manuscript.

589

## 590 **Competing financial interests**

591 The authors declare no competing financial interests.

592

## 593 **References**

- 594 Aigouy, B. & Mirouse, V., 2013, ScientiFig: a tool to build publication-ready scientific  
595 figures, *Nature methods*, 10(11), p. 1048.
- 596 Aigouy, B., Farhadifar, R., Staple, D.B., Sagner, A., Röper, J.C., Jülicher, F. & Eaton, S., 2010,  
597 Cell flow reorients the axis of planar polarity in the wing epithelium of *Drosophila*, *Cell*,  
598 142(5), pp. 773-86.
- 599 Aurich, F. & Dahmann, C., 2016, A Mutation in *fat2* Uncouples Tissue Elongation from  
600 Global Tissue Rotation, *Cell reports*, 14(11), pp. 2503-10.
- 601 Bach, E.A., Ekas, L.A., Ayala-Camargo, A., Flaherty, M.S., Lee, H., Perrimon, N. & Baeg, G.H.,  
602 2007, GFP reporters detect the activation of the *Drosophila* JAK/STAT pathway in vivo,  
603 *Gene expression patterns : GEP*, 7(3), pp. 323-31.
- 604 Bai, J. & Montell, D., 2002, Eyes absent, a key repressor of polar cell fate during  
605 *Drosophila* oogenesis, *Development (Cambridge, England)*, 129(23), pp. 5377-88.
- 606 Bastock, R. & St Johnston, D., 2008, *Drosophila* oogenesis, *Current biology : CB*, 18(23),  
607 pp. R1082-7.
- 608 Bateman, J., Reddy, R.S., Saito, H. & Van Vactor, D., 2001, The receptor tyrosine  
609 phosphatase Dlar and integrins organize actin filaments in the *Drosophila* follicular  
610 epithelium, *Current biology : CB*, 11(17), pp. 1317-27.
- 611 Bertet, C., Sulak, L. & Lecuit, T., 2004, Myosin-dependent junction remodelling controls  
612 planar cell intercalation and axis elongation, *Nature*, 429(6992), pp. 667-71.
- 613 Bénazéraf, B., Francois, P., Baker, R.E., Denans, N., Little, C.D. & Pourquié, O., 2010, A  
614 random cell motility gradient downstream of FGF controls elongation of an amniote  
615 embryo, *Nature*, 466(7303), pp. 248-52.
- 616 Bilder, D. & Haigo, S.L., 2012, Expanding the morphogenetic repertoire: perspectives  
617 from the *Drosophila* egg, *Developmental cell*, 22(1), pp. 12-23.
- 618 Blankenship, J.T., Backovic, S.T., Sanny, J.S., Weitz, O. & Zallen, J.A., 2006, Multicellular  
619 rosette formation links planar cell polarity to tissue morphogenesis, *Developmental cell*,  
620 11(4), pp. 459-70.
- 621 Borensztein A, Boissoneau E, Fernandez G, Agnès F, Pret AM. 2013, JAK/STAT  
622 autocontrol of ligand-producing cell number through apoptosis. *Development* 140, pp.  
623 195-204
- 624 Cetera, M. & Horne-Badovinac, S., 2015, Round and round gets you somewhere:  
625 collective cell migration and planar polarity in elongating *Drosophila* egg chambers,  
626 *Current opinion in genetics & development*, 32, pp. 10-5.
- 627 Cetera, M., Ramirez-San Juan, G.R., Oakes, P.W., Lewellyn, L., Fairchild, M.J., Tanentzapf,  
628 G., Gardel, M.L. & Horne-Badovinac, S., 2014, Epithelial rotation promotes the global  
629 alignment of contractile actin bundles during *Drosophila* egg chamber elongation,  
630 *Nature communications*, 5, p. 5511.
- 631 Chen, D.Y., Lipari, K.R., Dehghan, Y., Streichan, S.J. & Bilder, D., 2016, Symmetry Breaking  
632 in an Edgeless Epithelium by Fat2-Regulated Microtubule Polarity, *Cell reports*, 15(6),  
633 pp. 1125-33.
- 634 Collinet, C., Rauzi, M., Lenne, P.F. & Lecuit, T., 2015, Local and tissue-scale forces drive  
635 oriented junction growth during tissue extension, *Nature cell biology*, 17(10), pp. 1247-  
636 58.
- 637 Conder, R., Yu, H., Zahedi, B. & Harden, N., 2007, The serine/threonine kinase dPak is  
638 required for polarized assembly of F-actin bundles and apical-basal polarity in the  
639 *Drosophila* follicular epithelium, *Developmental biology*, 305(2), pp. 470-82.
- 640 Crest, J., Diz-Muñoz, A., Chen, D.Y., Fletcher, D.A. & Bilder, D., 2017, Organ sculpting by  
641 patterned extracellular matrix stiffness, *eLife*, 6.
- 642 Delon, I. & Brown, N.H., 2009, The integrin adhesion complex changes its composition  
643 and function during morphogenesis of an epithelium, *Journal of cell science*, 122(Pt 23),  
644 pp. 4363-74.

- 645 Díaz de la Loza, M.C., Díaz-Torres, A., Zurita, F., Rosales-Nieves, A.E., Moeendarbary, E.,  
646 Franze, K., Martín-Bermudo, M.D. & González-Reyes, A., 2017, Laminin Levels Regulate  
647 Tissue Migration and Anterior-Posterior Polarity during Egg Morphogenesis in  
648 *Drosophila*, *Cell reports*, 20(1), pp. 211-23.
- 649 Grammont, M. & Irvine, K.D., 2001, fringe and Notch specify polar cell fate during  
650 *Drosophila* oogenesis, *Development (Cambridge, England)*, 128(12), pp. 2243-53.
- 651 Gutzeit, H.O., 1990, The microfilament pattern in the somatic follicle cells of mid-  
652 vitellogenic ovarian follicles of *Drosophila*, *European journal of cell biology*, 53(2), pp.  
653 349-56.
- 654 Haigo, S.L. & Bilder, D., 2011, Global Tissue Revolutions in a Morphogenetic Movement  
655 Controlling Elongation, *Science (New York, N.Y.)*, 331(6020), pp. 1071-4.
- 656 He, B., Doubrovinski, K., Polyakov, O. & Wieschaus, E., 2014, Apical constriction drives  
657 tissue-scale hydrodynamic flow to mediate cell elongation, *Nature*, 508(7496), pp. 392-  
658 6.
- 659 He, L., Wang, X., Tang, H.L. & Montell, D.J., 2010, Tissue elongation requires oscillating  
660 contractions of a basal actomyosin network, *Nature cell biology*, 12(12), pp. 1133-42.
- 661 Heisenberg, C.P. & Bellaïche, Y., 2013, Forces in tissue morphogenesis and patterning,  
662 *Cell*, 153(5), pp. 948-62.
- 663 Horne-Badovinac, S. & Bilder, D., 2005, Mass transit: epithelial morphogenesis in the  
664 *Drosophila* egg chamber, *Developmental dynamics : an official publication of the*  
665 *American Association of Anatomists*, 232(3), pp. 559-74.
- 666 Irvine, K.D. & Wieschaus, E., 1994, Cell intercalation during *Drosophila* germband  
667 extension and its regulation by pair-rule segmentation genes, *Development (Cambridge,*  
668 *England)*, 120(4), pp. 827-41.
- 669 Isabella, A.J. & Horne-Badovinac, S., 2016, Rab10-Mediated Secretion Synergizes with  
670 Tissue Movement to Build a Polarized Basement Membrane Architecture for Organ  
671 Morphogenesis, *Developmental cell*, 38(1), pp. 47-60.
- 672 Johansen, K.A., Iwaki, D.D. & Lengyel, J.A., 2003, Localized JAK/STAT signaling is  
673 required for oriented cell rearrangement in a tubular epithelium, *Development*  
674 *(Cambridge, England)*, 130(1), pp. 135-45.
- 675 Lau, K., Tao, H., Liu, H., Wen, J., Sturgeon, K., Sorfazlian, N., Lazic, S., Burrows, J.T., Wong,  
676 M.D., Li, D., Deimling, S., Ciruna, B., Scott, I., Simmons, C., Henkelman, R.M., Williams, T.,  
677 Hadjantonakis, A.K., Fernandez-Gonzalez, R., Sun, Y. & Hopyan, S., 2015, Anisotropic  
678 stress orients remodelling of mammalian limb bud ectoderm, *Nature cell biology*, 17(5),  
679 pp. 569-79.
- 680 Lecuit, T., Lenne, P.F. & Munro, E., 2011, Force generation, transmission, and integration  
681 during cell and tissue morphogenesis, *Annual review of cell and developmental biology*,  
682 27, pp. 157-84.
- 683 Lerner, D.W., McCoy, D., Isabella, A.J., Mahowald, A.P., Gerlach, G.F., Chaudhry, T.A. &  
684 Horne-Badovinac, S., 2013, A Rab10-Dependent Mechanism for Polarized Basement  
685 Membrane Secretion during Organ Morphogenesis, *Developmental cell*, 24(2), pp. 159-  
686 68.
- 687 Lye, C.M., Blanchard, G.B., Naylor, H.W., Muresan, L., Huisken, J., Adams, R.J. & Sanson, B.,  
688 2015, Mechanical Coupling between Endoderm Invagination and Axis Extension in  
689 *Drosophila*, *PLoS biology*, 13(11), p. e1002292.
- 690 Martin, A.C. & Goldstein, B., 2014, Apical constriction: themes and variations on a  
691 cellular mechanism driving morphogenesis, *Development (Cambridge, England)*,  
692 141(10), pp. 1987-98.
- 693 Martin, A.C., Kaschube, M. & Wieschaus, E.F., 2009, Pulsed contractions of an actin-  
694 myosin network drive apical constriction, *Nature*, 457(7228), pp. 495-9.

- 695 McGregor, J.R., Xi, R. & Harrison, D.A., 2002, JAK signaling is somatically required for  
696 follicle cell differentiation in *Drosophila*, *Development (Cambridge, England)*, 129(3), pp.  
697 705-17.
- 698 Paré, A.C., Vichas, A., Fincher, C.T., Mirman, Z., Farrell, D.L., Mainieri, A. & Zallen, J.A.,  
699 2014, A positional Toll receptor code directs convergent extension in *Drosophila*,  
700 *Nature*, 515(7528), pp. 523-7.
- 701 Prasad, M., Jang, A.C., Starz-Gaiano, M., Melani, M. & Montell, D.J., 2007, A protocol for  
702 culturing *Drosophila melanogaster* stage 9 egg chambers for live imaging, *Nature*  
703 *protocols*, 2(10), pp. 2467-73.
- 704 Rauzi, M., Lenne, P.F. & Lecuit, T., 2010, Planar polarized actomyosin contractile flows  
705 control epithelial junction remodelling, *Nature*, 468(7327), pp. 1110-4.
- 706 Silver, D.L. & Montell, D.J., 2001, Paracrine signaling through the JAK/STAT pathway  
707 activates invasive behavior of ovarian epithelial cells in *Drosophila*, *Cell*, 107(7), pp. 831-  
708 41.
- 709 Spradling, A. 1993, Developmental genetics of oogenesis. The Development of  
710 *Drosophila Melanogaster*. Cold Spring Harbor Laboratory Press, pp.1-70
- 711 Sun, Z., Amourda, C., Shagirov, M., Hara, Y., Saunders, T.E. & Toyama, Y., 2017,  
712 Basolateral protrusion and apical contraction cooperatively drive *Drosophila* germ-band  
713 extension, *Nature cell biology*, 19(4), pp. 375-83.
- 714 Vachias, C., Fritsch, C., Pouchin, P., Bardot, O. & Mirouse, V., 2014, Tight coordination of  
715 growth and differentiation between germline and soma provides robustness for  
716 *drosophila* egg development, *Cell reports*, 9(2), pp. 531-41.
- 717 Viktorinová, I. & Dahmann, C., 2013, Microtubule polarity predicts direction of egg  
718 chamber rotation in *Drosophila*, *Current biology : CB*, 23(15), pp. 1472-7.
- 719 Viktorinová, I., König, T., Schlichting, K. & Dahmann, C., 2009, The cadherin Fat2 is  
720 required for planar cell polarity in the *Drosophila* ovary, *Development (Cambridge,*  
721 *England)*, 136(24), pp. 4123-32.
- 722 Vlachos, S. & Harden, N., 2011, Genetic evidence for antagonism between Pak protein  
723 kinase and Rho1 small GTPase signaling in regulation of the actin cytoskeleton during  
724 *Drosophila* oogenesis, *Genetics*, 187(2), pp. 501-12.
- 725 Vlachos, S., Jangam, S., Conder, R., Chou, M., Nystul, T. & Harden, N., 2015, A Pak-  
726 regulated cell intercalation event leading to a novel radial cell polarity is involved in  
727 positioning of the follicle stem cell niche in the *Drosophila* ovary, *Development*  
728 *(Cambridge, England)*, 142(1), pp. 82-91.
- 729 Wang, Y. & Riechmann, V., 2007, The role of the actomyosin cytoskeleton in coordination  
730 of tissue growth during *Drosophila* oogenesis, *Current biology : CB*, 17(15), pp. 1349-55.
- 731 Wells, R.E., Barry, J.D., Warrington, S.J., Cuhlmann, S., Evans, P., Huber, W., Strutt, D. &  
732 Zeidler, M.P., 2013, Control of tissue morphology by Fasciclin III-mediated intercellular  
733 adhesion, *Development (Cambridge, England)*, 140(18), pp. 3858-68.
- 734 Xi, R., McGregor, J.R. & Harrison, D.A., 2003, A gradient of JAK pathway activity patterns  
735 the anterior-posterior axis of the follicular epithelium, *Developmental cell*, 4(2), pp. 167-  
736 77.
- 737 Yamashita, S., Miyagi, C., Carmany-Rampey, A., Shimizu, T., Fujii, R., Schier, A.F. & Hirano,  
738 T., 2002, Stat3 Controls Cell Movements during Zebrafish Gastrulation, *Developmental*  
739 *cell*, 2(3), pp. 363-75.
- 740 Zallen, J.A. & Wieschaus, E., 2004, Patterned gene expression directs bipolar planar  
741 polarity in *Drosophila*, *Developmental cell*, 6(3), pp. 343-55.
- 742
- 743
- 744



**Figure 1 : Polar cells determine the axis of early elongation**

a) WT ovariole illustrating follicle elongation during the early stages of oogenesis (stage 2 to 6). b) Optical cross-section of a stage 7 WT follicle stained with FasIII, a polar cell marker (white), and F-actin (red). c) Stage 7 *fat2* mutant follicle stained with FasIII (white) and DE-Cad (red). d) Elongation kinetics of WT and *fat2* mutant follicles. e) Z-projection of a *Pak* mutant ovariole. Round follicles have only one cluster of polar cells (stage 5 and 8 follicles) or two non-diametrically opposed clusters (stage 3 follicle). f) Removing a copy of *Pvr* restores early elongation and polar cell position in *Pak* mutants. g) elongation coefficient of *Pak<sup>6</sup>/Pak<sup>11</sup>*, *Df(Pvr)/+* follicles, affecting (1) or not (2) polar cell positioning. h,i) view of a *mys* mutant clone (GFP-negative) in a mosaic follicle showing h) normal polar cell positioning and no elongation defect and i) abnormal polar cell positioning and early elongation defect. j) elongation coefficient of follicles containing mutant clones for *mys* affecting (3) or not (4) polar cell positioning.

(p \* < 0.05, \*\* < 0.01, \*\*\* < 0.001). On all picture scale bar is 10  $\mu$ m.



üCJ

üCC

üCü

üCE

üCw

üü)

üüh

üüR

üüD

üüö

üüJ

üüC

üüü

üüE

üüw

üE)

## Figure 2: Upd is a polarizing cue for early elongation

a) Optical cross-section of a WT stage 7 follicle stained with FasIII (polar cell marker, white) and F-actin (red). b) Expression of the 10xStatGFP reporter showing the progressive formation of a STAT gradient at each pole. Early elongation is affected by knocking down c) *upd* in polar cells or d) *Stat92E* in the anterior and posterior follicular cells. Early elongation is also affected by e) clonal ectopic expression of *upd* (GFP-positive cells) and by f) expression of a Hop gain of function mutant in all follicular cells. g) Quantification of the elongation coefficient in WT and the different JAK-STAT mutants (loss and gain of function) during early and intermediate stages of elongation (D, Driver; U, UAS line) ( $p < 0.05$ ,  $** < 0.01$ ,  $*** < 0.001$ ). h) Quantification of the Stat activity gradient at stage 3, 5 and 7 using the 10XSTATGFP reporter. A gradient is already visible at stage 3 and get more visible until stage 7. On all picture scale bar is 10  $\mu$ m. Relative intensity = intensity at a given position/mean intensity of measured signal.

ü

D)



üEh  
 üER  
 üED  
 üEö  
 üEJ  
 üEC  
 üEü  
 üEE  
 üEw  
 üEw  
 üEw

**Figure 3: Myosin II is required for early elongation and apical pulses**

a) WT and a') *sqh* knock-down stage 7 follicles stained for F-actin (red) and FasIII (white). b) elongation coefficient of WT or *sqh* knock-down follicles during the early elongation phase (D, Driver; U, UAS line). c) Fluorescence video-microscopy images of a stage 4 WT follicle that expresses BAZ-GFP and Sqh-mCherry. d) Higher magnification of the area highlighted in (c) showing a pulsing cell. e) Quantification of the cell apical surface (green) in the cell shown in (d) and of Sqh signal intensity in the apical area (red) over

791 time. f) Cross correlation analysis over time of apical surface and Sqh apical  
792 signal intensity based on 86 cells from 6 follicles at stage 3-4. g) Incubation  
793 with the Rok inhibitor Y-27632 strongly reduces pulse activity in stages 3  
794 to 5 WT follicles. Red bars represent mean and +/- sd, ( $n \geq 7$  follicles) h)  
795 Quantification of the length variation of the follicle cell AP and mediolateral  
796 axes during pulses indicates that pulses are isotropic. i) Quantification of  
797 the relative BAZ-GFP and Sqh-mCherry signal intensity in cell bounds in  
798 function of their angle relative to the AP axis ( $n=44$  follicles). Relative  
799 intensity is given over the mean bond intensity. j) Fixed stage 7 WT follicle  
800 that expresses GFP-Baz and Sqh-mCherry. On all picture scale bar is 10  $\mu\text{m}$ .  
801 (p \*\*\* $<0.001$ )  
802

E) D



E) Ö

E) J **Figure 4: JAK-STAT induces a double gradient of pulses**

E) C a) to d) images from movies of the mediolateral region of (a) stage 3 and (c) stage 7 BAZ-GFP expressing follicles, or of the area near the polar cells (red arrowheads) of (b) stage 3 and (d) stage 7 follicles. Scale bars :10 μm  
 E) ü e) Surface variation of individual cells (examples shown in a to d) in function of time (ML : mediolateral). The surface of each cell is divided by its average surface over time. f) Mean percentage of apical surface variation depending on stage and position (n≥9 follicles). g) Colour-coding of pulse intensity of a representative stage 7 follicle (tilted view from the pole, see schematic image in insert) reveals an intensity gradient from the polar cells (in green) to the mediolateral region. h) to j) Mean percentage of apical surface variation in the mediolateral region of (h) stage 3 to 5 follicles and (j) stage 7 to 8 follicles and (i) at the pole of stage 7 to 8 follicles for the indicated genotypes. h and i) n≥9, j) n≥5  
 E) E (p \*\*<0.01, \*\*\*<0.001, Red bars represent mean and +/- sd)

?

DD



ERJ

**Figure 5: Myosin II is not controlled by JAK-STAT but required at the poles**

a) Apical level of phosphorylated Sqh (pSqh, white and a') is reduced in a mutant *Stat92E* clone (RFP-negative) in a stage 3 follicle (z-projection of the superior half of the follicle).

b) Clonal overexpression of *Hop<sup>tum</sup>* (green cells) on a stage 7 follicle is not sufficient to increase the expression of apical pSqh (white and b') z-projection of the superior half of the follicle).

c) pSqh staining in the middle plane of on a wild-type stage 7 follicle

d) Quantification of the intensity of apical pSqh along the AP axis of stage 6-7 follicles. n=5 follicles. Baseline value = mean apical pSqh per follicle.

e) Quantification of the extrapolated aspect ratio (eAR) of stage 4 to 7 WT follicles or follicles with a *sqh<sup>AX3</sup>* or *Rok<sup>2</sup>* clone covering the anterior pole. Whereas, in WT follicles the anterior is significantly more curved than the posterior, the tendency is opposite with *sqh* and *Rok* clones. (p \*\*\*<0.001).

f,g,h,i) representative images of f) WT g) mediolateral *sqh<sup>AX3</sup>* clone h) anterior *sqh<sup>AX3</sup>* clone, i) anterior *Rok<sup>2</sup>* clone with the corresponding eARs.

ERJ

Dö



EDw

**Figure 6: localized apical cell constriction and oriented cell intercalation occur during early elongation**

a-e) Number of follicular cells in the plane of polar cells based on DE-Cad staining of stage 6 to 8 follicles depending on d) the stage and e) the aspect ratio of the follicle. a-c) AR and number of cells along the polar cell plane in representative stage (a) 6, (b) 7 and (c) 8 follicles stained for DE-Cad.

f) Heat map of the cell apical surface of a representative stage 7 follicle imaged as on Fig 4g. Arrowhead shows polar cells. g) Quantification of the relative apical cell surface (smallest cell = 1) in function of the distance from polar cells (n=10 stage 7 follicles, 1487 cells). h) apical cell surface and i) cell height depending on stage, position and genotype (ML: mediolateral).

j) representative top view and l) section view of a *Stat92E<sup>397</sup>* mutant clones at stage 3. Mutant cells have k) a larger apical surface and m) a lower cell height than wild-type cells. n) Schematic figure showing the progressive restriction of JAK-STAT signaling (green) and of cell constriction to the follicle poles.

DJ



### Figure 1 – Figure S1:

a) Elongation coefficients corresponding to the slope of the regression lines of the plots in b).

b,d,f) plot of the long axis as function of a short axis of b) *fat2* mutant follicles (red = WT, green = *fat2* st3-7, blue *fat2* st 3-8) d) *Pak<sup>6</sup>/Pak<sup>11</sup>, Df(Pvr)/+* follicles and f) follicles containing mutant clones for *mys*, affecting (blue) or not (red) polar cell positioning. Corresponding regression lines are represented.

c) *Pak<sup>6</sup>/Pak<sup>11</sup>, Df(Pvr)/+* follicle with a single cluster of polar cells.

e) z-projection of a follicle with a *mys* mutant clone and two misplaced polar cell clusters (red arrowheads). The green signal in the mutant clone comes from germline signal due to the z-projection.



**Figure 2- Figure S1**

a to c) Representative follicles expressing 10XStatGFP in a) WT b) *upd RNAi* or *Stat92E RNAi* background.

d) Quantification of the Stat activity gradient for the indicated genotypes at stage7 using the 10XSTATGFP reporter.

e) Quantification of the aspect ratio (AR) in WT and the different JAK-STAT mutants (loss and gain of function) during early and intermediate stages of elongation ( $p < 0.05$ ,  $** < 0.01$ ,  $*** < 0.001$ ).



Figure 3 –Figure S1 :

Follicles stained for pSqh (white in a,b, green in a',b') and F-actin (pink in a'b'). a) WT follicle b) SqhRNAi in follicle cells driven with Tj:Gal4. The signal is mainly apical in WT follicle cells and is strongly reduced in the knock-down.

c) AR quantification in WT or sqh knock-down follicles during the early elongation phase. (p \*\*\*<0.001)



**Figure 4 –Figure S1**

- a) Mean percentage of apical surface variation in the mediolateral region relative to the follicle length (corresponding stages are also indicated).
- b) Pulsing activity of individual cells from five stage 7 follicles (n=441 cells) relative to their distance from the polar cells (tilted view from the pole).



**Figure 5- Figure S1**

illustration of extrapolated Aspect Ratio (eAR) calculation based on width measure of a pole at 25% of AP axis length.



**Figure 6- Figure S1:**

- a) Orientation of cells with elongated shape in the mediolateral part of the follicle at the indicated stages (the X axis corresponds to the AP axis).
- b) Magnitude of the elongated cell shape according to the stage. Values correspond to an aspect ratio between 1.1 and 1.2.
- c) Fluorescence video-microscopy images of dividing wild type follicular cells that express H2A-RFP and SPD2-GFP to mark the centrosomes (yellow arrowheads).
- d) Orientation of cytokinetic figures (the X axis corresponds to AP axis).
- e) Calculation of FC volume depending on the position (pole or mediolateral (ML)) and the stage. Volume is higher in st7 ML due to the mitosis/endoreplication switch occurring at stage 6. However, cells at the poles maintains a lower volume.

## **Movie description**

### **Movie S1 :**

Full z-stack of a follicle with a *mys* mutant clone that affects polar cells

### **Movie S2 :**

Full z-stack of a follicle with a *mys* mutant clone that does not affect polar cells

### **Movie S3:**

Stage 3 follicle expressing Sqh-GFP. The pool of apical myosinII is very dynamic.

### **Movie S4:**

Zoom in on a cell of a stage 3 follicle expressing Baz-GFP and Sqh-mCherry. Apical MyosinII enrichment occurs at the same time as the apical cell domain contracts.

### **Movie S5:**

Stage 3 follicle expressing Baz-GFP. Cells in the mediolateral part undergo apical pulsations.

### **Movie S6:**

Stage 7 follicle expressing Baz-GFP. The apical surface variation is strongly reduced on the mediolateral part compared with stage 3 follicles.

### **Movie S7:**

Stage 7 follicle expressing Baz-GFP observed from the pole. Polar cells are indicated on the corresponding Figure 5d (red arrowheads). The pulse intensity remains high in these cells compared with movie S4. The rotation is visible and occurs around the polar cells.

### **Movie S8:**

Stage 3 follicle expressing Baz-GFP observed from the pole. Polar cells are indicated on the corresponding Figure 5b (red arrowhead).

### **Movie S9:**

Stage 3 *upd* knock-down follicle expressing Baz-GFP. The intensity of the pulse is reduced compared with a WT stage 3 follicle (movie S3).

**Movie S10:**

Stage 7 *upd* knock-down follicle expressing Baz-GFP and observed from the pole. The intensity of the pulse is reduced compared with a WT stage 7 follicle (movie S6).

**Movie S11:**

Stage 7 follicle expressing ectopically Baz-mCherry. The intensity of the pulse is low.

**Movie S12:**

Stage 7 follicle expressing ectopically Baz-mCherry and Hop<sup>tum</sup>. Activation of the JAK-STAT pathway is sufficient to increase the pulsing.

**Movie S13:**

Movie representing a stage 7 DE-Cad-GFP follicle imaged during two hours. One row of cell is tracked (red line). No intercalation occurs during this period.

## Supplementary table 1A: stock list and source

| Stock                                 | Genotype                                                                    | Source / Reference                       |
|---------------------------------------|-----------------------------------------------------------------------------|------------------------------------------|
| <i>Fat2</i> mutant                    | <i>fat2<sup>SBD</sup> / TM6B</i>                                            | Dahmann lab / (Viktorinová et al., 2009) |
| <i>Pak</i> mutants (2 alleles) (null) | <i>Pak<sup>11</sup> / TM3, Sb</i> and <i>Pak<sup>6</sup> / TM3, Sb, Ser</i> | BDSC / (Hing et al., 1999)               |
| <i>Df(Pvr)</i>                        | <i>w<sup>1118</sup>; Df(2L)BSC227 / CyO</i>                                 | BDSC                                     |
| <i>mys</i> mutant (null)              | <i>FRT101, mys<sup>XG43</sup> / FM7h ; βv1 / CyO</i>                        | Brown Lab / (Bunch et al., 1992)         |
| Tj :Gal4                              | <i>y, w, ; P(GawB)NP1624</i>                                                | DGRC Kyoto                               |
| Upd:GAL4                              | <i>P{upd1-GAL4.U}</i>                                                       | Pret Lab                                 |
| Fru:Gal4                              | <i>TI<sup>GAL4.P1.D</sup>{GAL4}</i>                                         | Pret Lab / (Boquet et al., 2000)         |
| Stat RNAi                             | <i>P{GD4492}v43866</i>                                                      | VDRC                                     |
| Upd RNAi                              | <i>P{TRiP.JF03149}attP2</i>                                                 | BDSC                                     |
| UAS :HopTum                           | <i>P{UAS-hop.Tum} / CyO</i>                                                 | Harrison lab / (Harrison et al., 1995)   |
| UAS :Upd                              | <i>P{UAS-Upd1}PK9</i>                                                       | Harrison lab                             |
| STAT10X:GFP                           | <i>P{10XStat92E-GFP}</i>                                                    | Crozatier M / (Bach et al., 2007)        |
| sqhRNAi                               | <i>P{TRiP.HMS00830}attP2</i>                                                | BDSC                                     |
| BazTrap                               | <i>P01941{PTT-GC}</i>                                                       | BDSC / (Buszczak et al., 2007)           |
| SqhGFP                                | <i>sqh<sup>Ax3</sup>; ; P{sqh-GFP.RLC}</i>                                  | Karess lab / (Royou et al., 2004)        |
| SqhCherry                             | <i>sqh<sup>Ax3</sup>; ; P{sqh-mCherry.M}3</i>                               | Wieschaus Lab / (Martin et al., 2009)    |
| UAS :Baz-Cherry                       | <i>P{UASp-Baz Cherry}III</i>                                                | This study*                              |
| <i>rok</i> mutant (null)              | <i>FRT9-2, rok<sup>2</sup> / FM0</i>                                        | Karess lab / (Winter et al., 2001)       |
| <i>sqh</i> mutant (null)              | <i>FRT101, Sqh<sup>AX3</sup> / FM7h</i>                                     | Karess lab / (Jordan and Karess, 1997)   |
| <i>Stat</i> mutant (null)             | <i>FRT82B, Stat92E<sup>397</sup> / TM6B</i>                                 | Montell lab / (Silver and Montell, 2001) |
| DE-Cad-GFP                            | <i>TI (Tiainen et al., 1999)shg<sup>GFP</sup></i>                           | B Aigouy / (Huang et al., 2009)          |
| Ubi:H2A-mRFP;<br>Ubi:spd-2-GFP        | <i>P{Ubi:H2A-mRFP}; P{Ubi:spd-2-GFP}</i>                                    | Basto lab / (Dix and Raff, 2007)         |

\* The Baz-Cherry fusion protein was produced by cloning mCherry in frame at the C-terminus of the Par-6 coding sequence in the pUASP vector.

## Supplementary table 1B: detailed genotypes and specific conditions

HS: 1 hour heat-shock at 37°C, when not specified flies were kept at 25°C.

| Figure   |         | Genotype                                                                       | Conditions |
|----------|---------|--------------------------------------------------------------------------------|------------|
| Figure 1 | a       | WT                                                                             |            |
|          | b       | WT                                                                             |            |
|          | c, d    | <i>fat2<sup>58D</sup>/fat2<sup>58D</sup></i>                                   |            |
|          | e       | <i>pak<sup>6</sup>/pak<sup>11</sup></i>                                        |            |
|          | f,g     | <i>Df(Pvr)/+; Pak<sup>6</sup>/Pak<sup>11</sup></i>                             |            |
|          | h, i, j | <i>FRT101, e22c:Gal4, UAS:flp/FRT101, mys<sup>XG43</sup>; 8v<sup>1</sup>/+</i> |            |

|          |        |                                                                                     |                               |
|----------|--------|-------------------------------------------------------------------------------------|-------------------------------|
| Figure 2 | a      | WT                                                                                  |                               |
|          | b, h   | 10X Stat:GFP                                                                        |                               |
|          | c, g   | <i>Upd:Gal4/+; RNAi upd1<sup>JF03149</sup></i>                                      | Cross at 25°C, 7 days at 30°C |
|          | d, g   | <i>Tub:Gal80<sup>TS</sup>/RNAi Stat92E<sup>T1B510</sup>; Fru:Gal4/+</i>             | Cross at 18°C, 3 days at 30°C |
|          | e      | <i>y,w,HS:flp122/+; tub:FRT-stop-FRT-gal4, UAS:GFP/+; [UAS:upd]<sup>pk9</sup>/+</i> | 1HS, 3 days after HS          |
|          | f,g    | <i>Tj:Gal4/UAS:Hop<sup>tum</sup></i>                                                | Cross at 25°C, 3 days at 30°C |
| Figure 3 | a      | WT                                                                                  |                               |
|          | a', b  | <i>Tj:Gal4/+; UAS: RNAi Sqh<sup>HMS00830</sup>/+</i>                                | Cross at 25°C, 6 days at 30°C |
|          | c-f, j | <i>Baz-GFP, sqh<sup>Ax3</sup>; Sqh-mCherry</i>                                      |                               |
|          | g, h   | <i>Baz-GFP</i>                                                                      |                               |

|                                                                                               |      |                                                                           |                               |
|-----------------------------------------------------------------------------------------------|------|---------------------------------------------------------------------------|-------------------------------|
| Figure 4                                                                                      | a-g  | <i>Baz-GFP</i>                                                            |                               |
|                                                                                               | h, i | <i>Baz-GFP</i>                                                            | 5 days at 30°C                |
|                                                                                               |      | <i>Baz-GFP/+; Tj:Gal4/+; RNAi upd1<sup>JF03149</sup></i>                  | Cross at 25°C, 5 days at 30°C |
|                                                                                               | j    | <i>y,w,HSflp122/+; tub:FRT-stop-FRT-gal4, UAS:GFP/+; UAS: Baz-mCherry</i> | 1HS, 3 days after HS at 25°C  |
| <i>y,w,HSflp122/+; tub:FRT-stop-FRT-gal4, UAS:GFP/UAS:Hop<sup>tum</sup>; UAS: Baz-mCherry</i> |      | 1HS, 3 days after HS at 25°                                               |                               |

|          |       |                                                                                   |                      |
|----------|-------|-----------------------------------------------------------------------------------|----------------------|
| Figure 5 | a     | <i>y,w,HS:flp122/+;;FRT82B, Ubi:RFP<sup>nl</sup>/FRT82B, Sta92E<sup>397</sup></i> | 1HS, 5 days after HS |
|          | b     | <i>y,w,HSflp122/+; tub:FRT-stop-FRT-gal4, UAS:GFP/UAS:Hop<sup>tum</sup></i>       | 1HS, 3 days after HS |
|          | c,d,f | WT                                                                                |                      |
|          | e,g,h | <i>y,w, FRT101 Ubi:GFP/ FRT101 Sqh<sup>Ax3</sup>; hsf1p/+</i>                     | 1HS, 5 days after HS |
|          | e,i   | <i>y,w, FRT9-2 Ubi:GFP/ FRT9-2 Rok<sup>2</sup>; hsf1p/+</i>                       | 1HS, 5 days after HS |

|                 |     |                                                                                     |                               |
|-----------------|-----|-------------------------------------------------------------------------------------|-------------------------------|
| <b>Figure 6</b> | a-e | WT                                                                                  |                               |
|                 | g,i | Baz-GFP                                                                             |                               |
|                 | i   | Baz-GFP/+; Tj:Gal4/+; RNAi upd1 <sup>JF03149</sup> / +                              | Cross at 25°C, 5 days at 30°C |
|                 | j   | <i>y,w,HS:flp122/+;;FRT82B, Ubi:RFP<sup>nl5</sup>/FRT82B, Stat92E<sup>397</sup></i> | 1HS, 10 days after HS         |

|                   |      |                                                                                |  |
|-------------------|------|--------------------------------------------------------------------------------|--|
| <b>Figure 1S1</b> | a, b | <i>Fat2<sup>58D</sup>/fat2<sup>58D</sup></i>                                   |  |
|                   | c,d  | <i>Df(Pvr)/+; Pak<sup>6</sup>/Pak<sup>11</sup></i>                             |  |
|                   | e,f  | <i>FRT101, e22c:Gal4, UAS:flp/FRT101, mys<sup>XG43</sup>; 8v<sup>1</sup>/+</i> |  |

|                   |     |                                                                                     |                                                                      |                               |
|-------------------|-----|-------------------------------------------------------------------------------------|----------------------------------------------------------------------|-------------------------------|
| <b>Figure 2S1</b> | a,d | Tj:gGal4, Tub:Gal80 <sup>TS</sup> / + ; 10xSTAT-GFP /+                              | 2 days at 30°C                                                       |                               |
|                   | b,d | Tj:gGal4 /+; 10xSTAT-GFP/RNAi upd1 <sup>JF03149</sup>                               | Cross at 25°C, 2 days at 30°C                                        |                               |
|                   | c,d | Tj:gGal4, Tub:Gal80 <sup>TS</sup> /RNAi Stat92E <sup>T1B510</sup> ; 10xSTAT-GFP / + | Cross at 18°C, 2 days at 30°C                                        |                               |
|                   | e   |                                                                                     | WT                                                                   |                               |
|                   |     |                                                                                     | Tj:Gal4/+; RNAi upd1 <sup>JF03149</sup> / +                          | Cross at 25°C, 5 days at 30°C |
|                   |     |                                                                                     | Tub:Gal80 <sup>TS</sup> /RNAi Stat92E <sup>T1B510</sup> ; Fru:Gal4/+ | Cross at 18°C, 3 days at 30°C |
|                   |     | Tj:Gal4/UAS:Hop <sup>tum</sup>                                                      | Cross at 25°C, 3 days at 30°C                                        |                               |

|                   |      |                                                 |                               |
|-------------------|------|-------------------------------------------------|-------------------------------|
| <b>Figure 3S1</b> | a    | WT                                              |                               |
|                   | b, c | Tj:Gal4/+; UAS: RNAi Sqh <sup>HMS00830</sup> /+ | Cross at 25°C, 6 days at 30°C |

|                   |     |         |  |
|-------------------|-----|---------|--|
| <b>Figure 4S1</b> | a,b | Baz-GFP |  |
|-------------------|-----|---------|--|

|                   |         |                             |  |
|-------------------|---------|-----------------------------|--|
| <b>Figure 6S1</b> | a, b, d | DE-Cad-GFP                  |  |
|                   | c       | Ubi:H2A-mRFP; Ubi:spd-2-GFP |  |
|                   | e       | Baz-GFP                     |  |

### Supplementary table 1C : detailed sample size

n corresponds to the number of analyzed follicles, with usually more than 10 segmented cells per follicle.

| Figure         |                                  |                            |                                 |
|----------------|----------------------------------|----------------------------|---------------------------------|
| <b>1d</b>      | <b>Stage</b>                     | <b>WT</b>                  | <b>Fat2</b>                     |
|                | 3                                | 43                         | 20                              |
|                | 4                                | 39                         | 26                              |
|                | 5                                | 20                         | 18                              |
|                | 6                                | 20                         | 11                              |
|                | 7                                | 21                         | 25                              |
|                | 8                                | 26                         | 38                              |
|                | 9                                | 40                         | 10                              |
|                | 10                               | 7                          | 10                              |
|                | 10B                              | 13                         | 10                              |
|                | 11                               | 18                         | 8                               |
|                | 12                               | 6                          | 7                               |
|                | 13                               | 13                         | 7                               |
|                | 14                               | 48                         | 15                              |
| <b>1j, 1S1</b> | <b>Mys<sup>XG43</sup> clones</b> | <b>WT-like polar cells</b> | <b>Myslocalized polar cells</b> |
|                |                                  | 34                         | 31                              |

|                |                                   |                            |                                 |
|----------------|-----------------------------------|----------------------------|---------------------------------|
| <b>1g, 1S1</b> | <b>Df(Pvr);pak<sup>6/11</sup></b> | <b>WT-like polar cells</b> | <b>Myslocalized polar cells</b> |
|                |                                   | 13                         | 23                              |

|           |                              |                          |                                   |                              |
|-----------|------------------------------|--------------------------|-----------------------------------|------------------------------|
| <b>2g</b> | <b>Each control (U or G)</b> | <b>Upd:Gal4; UpdRNAi</b> | <b>Tj:Gal4; Hop<sup>tum</sup></b> | <b>FruGal4; Stat92E RNAi</b> |
|           | 30                           | 41                       | 51                                | 97                           |

|           |                |                |                |
|-----------|----------------|----------------|----------------|
| <b>2j</b> | <b>Stage 3</b> | <b>Stage 5</b> | <b>Stage 7</b> |
|           | 5              | 5              | 6              |

|           |                |                 |                         |
|-----------|----------------|-----------------|-------------------------|
| <b>3b</b> | <b>Tj:Gal4</b> | <b>Sqh RNAi</b> | <b>Tj:Gal4;Sqh RNAi</b> |
|           | 65             | 30              | 46                      |

|           |             |          |
|-----------|-------------|----------|
| <b>3f</b> | 6 follicles | 86 cells |
|-----------|-------------|----------|

|           |                |                |
|-----------|----------------|----------------|
| <b>3g</b> | <b>Control</b> | <b>Y-27632</b> |
|           | 13             | 7              |

|           |                     |                     |                       |
|-----------|---------------------|---------------------|-----------------------|
| <b>3h</b> | <b>Stage 3-4 ML</b> | <b>Stage 7-8 ML</b> | <b>Stage 7-8 pole</b> |
|           | 14                  | 16                  | 15                    |

|           |                |                    |
|-----------|----------------|--------------------|
| <b>3i</b> | <b>Baz-GFP</b> | <b>Sqh-mCherry</b> |
|           | 44             | 41                 |

|           |                 |                 |                   |                    |
|-----------|-----------------|-----------------|-------------------|--------------------|
| <b>4f</b> | <b>St3-4 ML</b> | <b>St7-8 ML</b> | <b>St3-4 pole</b> | <b>St 7-8 pole</b> |
|           | 9               | 10              | 11                | 16                 |

|           |                    |                          |
|-----------|--------------------|--------------------------|
| <b>4h</b> | <b>WT St3-4 ML</b> | <b>Upd RNAi St3-4 ML</b> |
|           | 16                 | 9                        |

|           |                       |                             |
|-----------|-----------------------|-----------------------------|
| <b>4i</b> | <b>WT St 7-8 pole</b> | <b>Upd RNAi St 7-8 pole</b> |
|           | 16                    | 9                           |

|           |                |                                  |
|-----------|----------------|----------------------------------|
| <b>4j</b> | <b>Control</b> | <b>Flipout Hop<sup>tum</sup></b> |
|           | 8              | 5                                |

|           |                     |             |
|-----------|---------------------|-------------|
| <b>5d</b> | 2 measures/follicle | 5 follicles |
|-----------|---------------------|-------------|

|           |           |                           |                           |
|-----------|-----------|---------------------------|---------------------------|
| <b>5e</b> | <b>WT</b> | <b>Sqh anterior clone</b> | <b>Rok anterior clone</b> |
|           | 16        | 10                        | 11                        |

|           |                |                |                |
|-----------|----------------|----------------|----------------|
| <b>6d</b> | <b>Stage 6</b> | <b>Stage 7</b> | <b>Stage 8</b> |
|           | 44             | 97             | 130            |

|           |     |
|-----------|-----|
| <b>6e</b> | 271 |
|-----------|-----|

|           |              |            |
|-----------|--------------|------------|
| <b>6g</b> | 10 follicles | 1487 cells |
|-----------|--------------|------------|

|           |                 |                   |                 |                    |                             |
|-----------|-----------------|-------------------|-----------------|--------------------|-----------------------------|
| <b>6h</b> | <b>St3-4 ML</b> | <b>St3-4 pole</b> | <b>St7-8 ML</b> | <b>St 7-8 pole</b> | <b>St 7-8 pole RNAi Upd</b> |
|           | 9               | 11                | 9               | 10                 | 10                          |

|           |                                    |
|-----------|------------------------------------|
| <b>6i</b> | <b>For all conditions</b>          |
|           | 2 measures/follicle<br>6 follicles |

|           |                        |
|-----------|------------------------|
| <b>6k</b> | 10 stage 3-5 follicles |
|-----------|------------------------|

|           |                        |                                 |
|-----------|------------------------|---------------------------------|
| <b>6m</b> | 12 stage 3-5 follicles | 3 measure/follicle/<br>genotype |
|-----------|------------------------|---------------------------------|

|             |           |                 |                  |
|-------------|-----------|-----------------|------------------|
| <b>2S1d</b> | <b>WT</b> | <b>Upd RNAi</b> | <b>Stat RNAi</b> |
|             | 14        | 8               | 9                |

| <b>2S1e</b> | <b>Stage</b> | <b>WT</b> | <b>Upd RNAi</b> | <b>Hop<sup>tum</sup></b> | <b>Stat RNAi</b> |
|-------------|--------------|-----------|-----------------|--------------------------|------------------|
|             | 3            | 43        | 18              | 7                        | 29               |
|             | 4            | 39        | 15              | 11                       | 15               |
|             | 5            | 20        | 20              | 12                       | 20               |
|             | 6            | 20        | 10              | 5                        | 18               |
|             | 7            | 21        | 12              | 16                       | 15               |
|             | 8            | 26        | 11              | 7                        | 7                |
|             | 9            | 40        | 11              | 10                       | 8                |

| <b>3S1c</b> | <b>Stage</b> | <b>WT</b> | <b>Sqh RNAi</b> |
|-------------|--------------|-----------|-----------------|
|             | 3            | 43        | 8               |
|             | 4            | 39        | 14              |
|             | 5            | 20        | 9               |
|             | 6            | 20        | 9               |
|             | 7            | 21        | 6               |
|             | 8            | 26        | 14              |
|             | 9            | 40        | 9               |

|             |              |
|-------------|--------------|
| <b>4S1a</b> | 35 follicles |
|-------------|--------------|

|             |             |           |
|-------------|-------------|-----------|
| <b>4S1b</b> | 5 follicles | 441 cells |
|-------------|-------------|-----------|

| <b>6S1a,b</b> | <b>Stage</b> | <b>WT</b> |
|---------------|--------------|-----------|
|               | 3            | 31        |
|               | 4            | 21        |
|               | 5            | 19        |
|               | 6            | 23        |
|               | 7            | 25        |
|               | 8            | 25        |

|             |                  |               |
|-------------|------------------|---------------|
| <b>6S1d</b> | <b>Stage 3-5</b> | 202 divisions |
|-------------|------------------|---------------|

## **bibliography associated with fly stocks**

Bach, E.A. et al., 2007. GFP reporters detect the activation of the *Drosophila* JAK/STAT pathway in vivo. *Gene Expr Patterns* 7, 323-331.

Boquet, I. et al., 2000. Central brain postembryonic development in *Drosophila*: implication of genes expressed at the interhemispheric junction. *J Neurobiol* 42, 33-48.

Bunch, T.A. et al., 1992. Characterization of mutant alleles of *mysospheroid*, the gene encoding the beta subunit of the *Drosophila* PS integrins. *Genetics* 132, 519-528.

Buszczak, M. et al., 2007. The carnegie protein trap library: a versatile tool for *Drosophila* developmental studies. *Genetics* 175, 1505-1531.

- Dix, C.I., Raff, J.W., 2007. *Drosophila* Spd-2 recruits PCM to the sperm centriole, but is dispensable for centriole duplication. *Curr Biol* 17, 1759-1764.
- Harrison, D.A. et al., 1995. Activation of a *Drosophila* Janus kinase (JAK) causes hematopoietic neoplasia and developmental defects. *EMBO J* 14, 2857-2865.
- Hing, H. et al., 1999. Pak functions downstream of Dock to regulate photoreceptor axon guidance in *Drosophila*. *Cell* 97, 853-863.
- Huang, J. et al., 2009. From the Cover: Directed, efficient, and versatile modifications of the *Drosophila* genome by genomic engineering. *Proc Natl Acad Sci U S A* 106, 8284-8289.
- Jordan, P., Karess, R., 1997. Myosin light chain-activating phosphorylation sites are required for oogenesis in *Drosophila*. *J Cell Biol* 139, 1805-1819.
- Martin, A.C. et al., 2009. Pulsed contractions of an actin-myosin network drive apical constriction. *Nature* 457, 495-499.
- Royou, A. et al., 2004. Reassessing the role and dynamics of nonmuscle myosin II during furrow formation in early *Drosophila* embryos. *Mol Biol Cell* 15, 838-850.
- Silver, D.L., Montell, D.J., 2001. Paracrine signaling through the JAK/STAT pathway activates invasive behavior of ovarian epithelial cells in *Drosophila*. *Cell* 107, 831-841.
- Tiainen, M. et al., 1999. Growth suppression by Lkb1 is mediated by a G(1) cell cycle arrest. *Proc Natl Acad Sci U S A* 96, 9248-9251.
- Viktorinová, I. et al., 2009. The cadherin Fat2 is required for planar cell polarity in the *Drosophila* ovary. *Development* 136, 4123-4132.
- Winter, C.G. et al., 2001. *Drosophila* Rho-associated kinase (Drok) links Frizzled-mediated planar cell polarity signaling to the actin cytoskeleton. *Cell* 105, 81-91.

## **Movie description**

### **Movie S1 :**

Full z-stack of a follicle with a *mys* mutant clone that affects polar cells

### **Movie S2 :**

Full z-stack of a follicle with a *mys* mutant clone that does not affect polar cells

### **Movie S3:**

Stage 3 follicle expressing Sqh-GFP. The pool of apical myosinII is very dynamic.

### **Movie S4:**

Zoom in on a cell of a stage 3 follicle expressing Baz-GFP and Sqh-mCherry. Apical MyosinII enrichment occurs at the same time as the apical cell domain contracts.

### **Movie S5:**

Stage 3 follicle expressing Baz-GFP. Cells in the mediolateral part undergo apical pulsations.

### **Movie S6:**

Stage 7 follicle expressing Baz-GFP. The apical surface variation is strongly reduced on the mediolateral part compared with stage 3 follicles.

### **Movie S7:**

Stage 7 follicle expressing Baz-GFP observed from the pole. Polar cells are indicated on the corresponding Figure 5d (red arrowheads). The pulse intensity remains high in these cells compared with movie S4. The rotation is visible and occurs around the polar cells.

### **Movie S8:**

Stage 3 follicle expressing Baz-GFP observed from the pole. Polar cells are indicated on the corresponding Figure 5b (red arrowhead).

### **Movie S9:**

Stage 3 *upd* knock-down follicle expressing Baz-GFP. The intensity of the pulse is reduced compared with a WT stage 3 follicle (movie S3).

**Movie S10:**

Stage 7 *upd* knock-down follicle expressing Baz-GFP and observed from the pole. The intensity of the pulse is reduced compared with a WT stage 7 follicle (movie S6).

**Movie S11:**

Stage 7 follicle expressing ectopically Baz-mCherry. The intensity of the pulse is low.

**Movie S12:**

Stage 7 follicle expressing ectopically Baz-mCherry and Hop<sup>tum</sup>. Activation of the JAK-STAT pathway is sufficient to increase the pulsing.

**Movie S13:**

Movie representing a stage 7 DE-Cad-GFP follicle imaged during two hours. One row of cell is tracked (red line). No intercalation occurs during this period.

## Supplementary table 1A: stock list and source

| Stock                                 | Genotype                                                                    | Source / Reference                       |
|---------------------------------------|-----------------------------------------------------------------------------|------------------------------------------|
| <i>Fat2</i> mutant                    | <i>fat2<sup>SBD</sup> / TM6B</i>                                            | Dahmann lab / (Viktorinová et al., 2009) |
| <i>Pak</i> mutants (2 alleles) (null) | <i>Pak<sup>11</sup> / TM3, Sb</i> and <i>Pak<sup>6</sup> / TM3, Sb, Ser</i> | BDSC / (Hing et al., 1999)               |
| <i>Df(Pvr)</i>                        | <i>w<sup>1118</sup>; Df(2L)BSC227 / CyO</i>                                 | BDSC                                     |
| <i>mys</i> mutant (null)              | <i>FRT101, mys<sup>XG43</sup> / FM7h ; βv1 / CyO</i>                        | Brown Lab / (Bunch et al., 1992)         |
| Tj :Gal4                              | <i>y, w, ; P(GawB)NP1624</i>                                                | DGRC Kyoto                               |
| Upd:GAL4                              | <i>P{upd1-GAL4.U}</i>                                                       | Pret Lab                                 |
| Fru:Gal4                              | <i>TI<sup>GAL4.P1.D</sup>{GAL4}</i>                                         | Pret Lab / (Boquet et al., 2000)         |
| Stat RNAi                             | <i>P{GD4492}v43866</i>                                                      | VDRC                                     |
| Upd RNAi                              | <i>P{TRiP.JF03149}attP2</i>                                                 | BDSC                                     |
| UAS :HopTum                           | <i>P{UAS-hop.Tum} / CyO</i>                                                 | Harisson lab / (Harrison et al., 1995)   |
| UAS :Upd                              | <i>P{UAS-Upd1}PK9</i>                                                       | Harisson lab                             |
| STAT10X:GFP                           | <i>P{10XStat92E-GFP}</i>                                                    | Crozatier M / (Bach et al., 2007)        |
| sqhRNAi                               | <i>P{TRiP.HMS00830}attP2</i>                                                | BDSC                                     |
| BazTrap                               | <i>P01941{PTT-GC}</i>                                                       | BDSC / (Buszczak et al., 2007)           |
| SqhGFP                                | <i>sqh<sup>Ax3</sup>; ; P{sqh-GFP.RLC}</i>                                  | Karess lab / (Royou et al., 2004)        |
| SqhCherry                             | <i>sqh<sup>Ax3</sup>; ; P{sqh-mCherry.M}3</i>                               | Wieschaus Lab / (Martin et al., 2009)    |
| UAS :Baz-Cherry                       | <i>P{UASp-Baz Cherry}III</i>                                                | This study*                              |
| <i>rok</i> mutant (null)              | <i>FRT9-2, rok<sup>2</sup> / FM0</i>                                        | Karess lab / (Winter et al., 2001)       |
| <i>sqh</i> mutant (null)              | <i>FRT101, Sqh<sup>AX3</sup> / FM7h</i>                                     | Karess lab / (Jordan and Karess, 1997)   |
| <i>Stat</i> mutant (null)             | <i>FRT82B, Stat92E<sup>397</sup> / TM6B</i>                                 | Montell lab / (Silver and Montell, 2001) |
| DE-Cad-GFP                            | <i>TI (Tiainen et al., 1999)shg<sup>GFP</sup></i>                           | B Aigouy / (Huang et al., 2009)          |
| Ubi:H2A-mRFP;<br>Ubi:spd-2-GFP        | <i>P{Ubi:H2A-mRFP}; P{Ubi:spd-2-GFP}</i>                                    | Basto lab / (Dix and Raff, 2007)         |

\* The Baz-Cherry fusion protein was produced by cloning mCherry in frame at the C-terminus of the Par-6 coding sequence in the pUASP vector.

## Supplementary table 1B: detailed genotypes and specific conditions

HS: 1 hour heat-shock at 37°C, when not specified flies were kept at 25°C.

| Figure   |         | Genotype                                                                       | Conditions |
|----------|---------|--------------------------------------------------------------------------------|------------|
| Figure 1 | a       | WT                                                                             |            |
|          | b       | WT                                                                             |            |
|          | c, d    | <i>fat2<sup>58D</sup>/fat2<sup>58D</sup></i>                                   |            |
|          | e       | <i>pak<sup>6</sup>/pak<sup>11</sup></i>                                        |            |
|          | f,g     | <i>Df(Pvr)/+; Pak<sup>6</sup>/Pak<sup>11</sup></i>                             |            |
|          | h, i, j | <i>FRT101, e22c:Gal4, UAS:flp/FRT101, mys<sup>XG43</sup>; 8v<sup>1</sup>/+</i> |            |

|          |        |                                                                                     |                               |
|----------|--------|-------------------------------------------------------------------------------------|-------------------------------|
| Figure 2 | a      | WT                                                                                  |                               |
|          | b, h   | 10X Stat:GFP                                                                        |                               |
|          | c, g   | <i>Upd:Gal4/+; RNAi upd1<sup>JF03149</sup></i>                                      | Cross at 25°C, 7 days at 30°C |
|          | d, g   | <i>Tub:Gal80<sup>TS</sup>/RNAi Stat92E<sup>T1B510</sup>; Fru:Gal4/+</i>             | Cross at 18°C, 3 days at 30°C |
|          | e      | <i>y,w,HS:flp122/+; tub:FRT-stop-FRT-gal4, UAS:GFP/+; [UAS:upd]<sup>pk9</sup>/+</i> | 1HS, 3 days after HS          |
|          | f,g    | <i>Tj:Gal4/UAS:Hop<sup>tum</sup></i>                                                | Cross at 25°C, 3 days at 30°C |
| Figure 3 | a      | WT                                                                                  |                               |
|          | a', b  | <i>Tj:Gal4/+; UAS: RNAi Sqh<sup>HMS00830</sup>/+</i>                                | Cross at 25°C, 6 days at 30°C |
|          | c-f, j | <i>Baz-GFP, sqh<sup>Ax3</sup>; Sqh-mCherry</i>                                      |                               |
|          | g, h   | <i>Baz-GFP</i>                                                                      |                               |

|                                                                                               |      |                                                                           |                               |
|-----------------------------------------------------------------------------------------------|------|---------------------------------------------------------------------------|-------------------------------|
| Figure 4                                                                                      | a-g  | <i>Baz-GFP</i>                                                            |                               |
|                                                                                               | h, i | <i>Baz-GFP</i>                                                            | 5 days at 30°C                |
|                                                                                               |      | <i>Baz-GFP/+; Tj:Gal4/+; RNAi upd1<sup>JF03149</sup></i>                  | Cross at 25°C, 5 days at 30°C |
|                                                                                               | j    | <i>y,w,HSflp122/+; tub:FRT-stop-FRT-gal4, UAS:GFP/+; UAS: Baz-mCherry</i> | 1HS, 3 days after HS at 25°C  |
| <i>y,w,HSflp122/+; tub:FRT-stop-FRT-gal4, UAS:GFP/UAS:Hop<sup>tum</sup>; UAS: Baz-mCherry</i> |      | 1HS, 3 days after HS at 25°                                               |                               |

|          |       |                                                                                   |                      |
|----------|-------|-----------------------------------------------------------------------------------|----------------------|
| Figure 5 | a     | <i>y,w,HS:flp122/+;;FRT82B, Ubi:RFP<sup>nl</sup>/FRT82B, Sta92E<sup>397</sup></i> | 1HS, 5 days after HS |
|          | b     | <i>y,w,HSflp122/+; tub:FRT-stop-FRT-gal4, UAS:GFP/UAS:Hop<sup>tum</sup></i>       | 1HS, 3 days after HS |
|          | c,d,f | WT                                                                                |                      |
|          | e,g,h | <i>y,w, FRT101 Ubi:GFP/ FRT101 Sqh<sup>Ax3</sup>; hsf1p/+</i>                     | 1HS, 5 days after HS |
|          | e,i   | <i>y,w, FRT9-2 Ubi:GFP/ FRT9-2 Rok<sup>2</sup>; hsf1p/+</i>                       | 1HS, 5 days after HS |

|                 |     |                                                                                     |                               |
|-----------------|-----|-------------------------------------------------------------------------------------|-------------------------------|
| <b>Figure 6</b> | a-e | WT                                                                                  |                               |
|                 | g,i | Baz-GFP                                                                             |                               |
|                 | i   | Baz-GFP/+; Tj:Gal4/+; RNAi upd1 <sup>JF03149</sup> / +                              | Cross at 25°C, 5 days at 30°C |
|                 | j   | <i>y,w,HS:flp122/+;;FRT82B, Ubi:RFP<sup>nl5</sup>/FRT82B, Stat92E<sup>397</sup></i> | 1HS, 10 days after HS         |

|                   |      |                                                                                |  |
|-------------------|------|--------------------------------------------------------------------------------|--|
| <b>Figure 1S1</b> | a, b | <i>Fat2<sup>58D</sup>/fat2<sup>58D</sup></i>                                   |  |
|                   | c,d  | <i>Df(Pvr)/+; Pak<sup>6</sup>/Pak<sup>11</sup></i>                             |  |
|                   | e,f  | <i>FRT101, e22c:Gal4, UAS:flp/FRT101, mys<sup>XG43</sup>; 8v<sup>1</sup>/+</i> |  |

|                   |     |                                                                                     |                                                                      |                               |
|-------------------|-----|-------------------------------------------------------------------------------------|----------------------------------------------------------------------|-------------------------------|
| <b>Figure 2S1</b> | a,d | Tj:gGal4, Tub:Gal80 <sup>TS</sup> / + ; 10xSTAT-GFP /+                              | 2 days at 30°C                                                       |                               |
|                   | b,d | Tj:gGal4 /+; 10xSTAT-GFP/RNAi upd1 <sup>JF03149</sup>                               | Cross at 25°C, 2 days at 30°C                                        |                               |
|                   | c,d | Tj:gGal4, Tub:Gal80 <sup>TS</sup> /RNAi Stat92E <sup>T1B510</sup> ; 10xSTAT-GFP / + | Cross at 18°C, 2 days at 30°C                                        |                               |
|                   | e   |                                                                                     | WT                                                                   |                               |
|                   |     |                                                                                     | Tj:Gal4/+; RNAi upd1 <sup>JF03149</sup> / +                          | Cross at 25°C, 5 days at 30°C |
|                   |     |                                                                                     | Tub:Gal80 <sup>TS</sup> /RNAi Stat92E <sup>T1B510</sup> ; Fru:Gal4/+ | Cross at 18°C, 3 days at 30°C |
|                   |     |                                                                                     | Tj:Gal4/UAS:Hop <sup>tum</sup>                                       | Cross at 25°C, 3 days at 30°C |

|                   |      |                                                 |                               |
|-------------------|------|-------------------------------------------------|-------------------------------|
| <b>Figure 3S1</b> | a    | WT                                              |                               |
|                   | b, c | Tj:Gal4/+; UAS: RNAi Sqh <sup>HMS00830</sup> /+ | Cross at 25°C, 6 days at 30°C |

|                   |     |         |  |
|-------------------|-----|---------|--|
| <b>Figure 4S1</b> | a,b | Baz-GFP |  |
|-------------------|-----|---------|--|

|                   |         |                             |  |
|-------------------|---------|-----------------------------|--|
| <b>Figure 6S1</b> | a, b, d | DE-Cad-GFP                  |  |
|                   | c       | Ubi:H2A-mRFP; Ubi:spd-2-GFP |  |
|                   | e       | Baz-GFP                     |  |

### Supplementary table 1C : detailed sample size

n corresponds to the number of analyzed follicles, with usually more than 10 segmented cells per follicle.

| Figure | Stage   | WT                               | <i>Fat2</i>         |
|--------|---------|----------------------------------|---------------------|
| 1d     | 3       | 43                               | 20                  |
|        | 4       | 39                               | 26                  |
|        | 5       | 20                               | 18                  |
|        | 6       | 20                               | 11                  |
|        | 7       | 21                               | 25                  |
|        | 8       | 26                               | 38                  |
|        | 9       | 40                               | 10                  |
|        | 10      | 7                                | 10                  |
|        | 10B     | 13                               | 10                  |
|        | 11      | 18                               | 8                   |
|        | 12      | 6                                | 7                   |
|        | 13      | 13                               | 7                   |
|        | 14      | 48                               | 15                  |
|        | 1j, 1S1 | <i>Mys<sup>XG43</sup></i> clones | WT-like polar cells |
| 34     |         |                                  | 31                  |

| 1g, 1S1 |                                   | WT-like polar cells | Myslocalized polar cells |
|---------|-----------------------------------|---------------------|--------------------------|
|         | <i>Df(Pvr);pak<sup>6/11</sup></i> | 13                  | 23                       |

| 2g | Each control (U or G) | Upd:Gal4; UpdRNAi | Tj:Gal4; Hop <sup>tum</sup> | FruGal4; Stat92E RNAi |
|----|-----------------------|-------------------|-----------------------------|-----------------------|
|    | 30                    | 41                | 51                          | 97                    |

| 2j | Stage 3 | Stage 5 | Stage 7 |
|----|---------|---------|---------|
|    | 5       | 5       | 6       |

| 3b | Tj:Gal4 | Sqh RNAi | Tj:Gal4;Sqh RNAi |
|----|---------|----------|------------------|
|    | 65      | 30       | 46               |

|    |             |          |
|----|-------------|----------|
| 3f | 6 follicles | 86 cells |
|----|-------------|----------|

| 3g | Control | Y-27632 |
|----|---------|---------|
|    | 13      | 7       |

| 3h | Stage 3-4 ML | Stage 7-8 ML | Stage 7-8 pole |
|----|--------------|--------------|----------------|
|    | 14           | 16           | 15             |

|           |                |                    |
|-----------|----------------|--------------------|
| <b>3i</b> | <b>Baz-GFP</b> | <b>Sqh-mCherry</b> |
|           | 44             | 41                 |

|           |                 |                 |                   |                    |
|-----------|-----------------|-----------------|-------------------|--------------------|
| <b>4f</b> | <b>St3-4 ML</b> | <b>St7-8 ML</b> | <b>St3-4 pole</b> | <b>St 7-8 pole</b> |
|           | 9               | 10              | 11                | 16                 |

|           |                    |                          |
|-----------|--------------------|--------------------------|
| <b>4h</b> | <b>WT St3-4 ML</b> | <b>Upd RNAi St3-4 ML</b> |
|           | 16                 | 9                        |

|           |                       |                             |
|-----------|-----------------------|-----------------------------|
| <b>4i</b> | <b>WT St 7-8 pole</b> | <b>Upd RNAi St 7-8 pole</b> |
|           | 16                    | 9                           |

|           |                |                                  |
|-----------|----------------|----------------------------------|
| <b>4j</b> | <b>Control</b> | <b>Flipout Hop<sup>tum</sup></b> |
|           | 8              | 5                                |

|           |                     |             |
|-----------|---------------------|-------------|
| <b>5d</b> | 2 measures/follicle | 5 follicles |
|-----------|---------------------|-------------|

|           |           |                           |                           |
|-----------|-----------|---------------------------|---------------------------|
| <b>5e</b> | <b>WT</b> | <b>Sqh anterior clone</b> | <b>Rok anterior clone</b> |
|           | 16        | 10                        | 11                        |

|           |                |                |                |
|-----------|----------------|----------------|----------------|
| <b>6d</b> | <b>Stage 6</b> | <b>Stage 7</b> | <b>Stage 8</b> |
|           | 44             | 97             | 130            |

|           |     |
|-----------|-----|
| <b>6e</b> | 271 |
|-----------|-----|

|           |              |            |
|-----------|--------------|------------|
| <b>6g</b> | 10 follicles | 1487 cells |
|-----------|--------------|------------|

|           |                 |                   |                 |                    |                             |
|-----------|-----------------|-------------------|-----------------|--------------------|-----------------------------|
| <b>6h</b> | <b>St3-4 ML</b> | <b>St3-4 pole</b> | <b>St7-8 ML</b> | <b>St 7-8 pole</b> | <b>St 7-8 pole RNAi Upd</b> |
|           | 9               | 11                | 9               | 10                 | 10                          |

|           |                                    |
|-----------|------------------------------------|
| <b>6i</b> | <b>For all conditions</b>          |
|           | 2 measures/follicle<br>6 follicles |

|           |                        |
|-----------|------------------------|
| <b>6k</b> | 10 stage 3-5 follicles |
|-----------|------------------------|

|           |                        |                                 |
|-----------|------------------------|---------------------------------|
| <b>6m</b> | 12 stage 3-5 follicles | 3 measure/follicle/<br>genotype |
|-----------|------------------------|---------------------------------|

|             |           |                 |                  |
|-------------|-----------|-----------------|------------------|
| <b>2S1d</b> | <b>WT</b> | <b>Upd RNAi</b> | <b>Stat RNAi</b> |
|             | 14        | 8               | 9                |

| <b>2S1e</b> | <b>Stage</b> | <b>WT</b> | <b>Upd RNAi</b> | <b>Hop<sup>tum</sup></b> | <b>Stat RNAi</b> |
|-------------|--------------|-----------|-----------------|--------------------------|------------------|
|             | 3            | 43        | 18              | 7                        | 29               |
|             | 4            | 39        | 15              | 11                       | 15               |
|             | 5            | 20        | 20              | 12                       | 20               |
|             | 6            | 20        | 10              | 5                        | 18               |
|             | 7            | 21        | 12              | 16                       | 15               |
|             | 8            | 26        | 11              | 7                        | 7                |
|             | 9            | 40        | 11              | 10                       | 8                |

| <b>3S1c</b> | <b>Stage</b> | <b>WT</b> | <b>Sqh RNAi</b> |
|-------------|--------------|-----------|-----------------|
|             | 3            | 43        | 8               |
|             | 4            | 39        | 14              |
|             | 5            | 20        | 9               |
|             | 6            | 20        | 9               |
|             | 7            | 21        | 6               |
|             | 8            | 26        | 14              |
|             | 9            | 40        | 9               |

|             |              |
|-------------|--------------|
| <b>4S1a</b> | 35 follicles |
|-------------|--------------|

|             |             |           |
|-------------|-------------|-----------|
| <b>4S1b</b> | 5 follicles | 441 cells |
|-------------|-------------|-----------|

| <b>6S1a,b</b> | <b>Stage</b> | <b>WT</b> |
|---------------|--------------|-----------|
|               | 3            | 31        |
|               | 4            | 21        |
|               | 5            | 19        |
|               | 6            | 23        |
|               | 7            | 25        |
|               | 8            | 25        |

|             |                  |               |
|-------------|------------------|---------------|
| <b>6S1d</b> | <b>Stage 3-5</b> | 202 divisions |
|-------------|------------------|---------------|

## **bibliography associated with fly stocks**

Bach, E.A. et al., 2007. GFP reporters detect the activation of the *Drosophila* JAK/STAT pathway in vivo. *Gene Expr Patterns* 7, 323-331.

Boquet, I. et al., 2000. Central brain postembryonic development in *Drosophila*: implication of genes expressed at the interhemispheric junction. *J Neurobiol* 42, 33-48.

Bunch, T.A. et al., 1992. Characterization of mutant alleles of *myospheroid*, the gene encoding the beta subunit of the *Drosophila* PS integrins. *Genetics* 132, 519-528.

Buszczak, M. et al., 2007. The carnegie protein trap library: a versatile tool for *Drosophila* developmental studies. *Genetics* 175, 1505-1531.

- Dix, C.I., Raff, J.W., 2007. *Drosophila* Spd-2 recruits PCM to the sperm centriole, but is dispensable for centriole duplication. *Curr Biol* 17, 1759-1764.
- Harrison, D.A. et al., 1995. Activation of a *Drosophila* Janus kinase (JAK) causes hematopoietic neoplasia and developmental defects. *EMBO J* 14, 2857-2865.
- Hing, H. et al., 1999. Pak functions downstream of Dock to regulate photoreceptor axon guidance in *Drosophila*. *Cell* 97, 853-863.
- Huang, J. et al., 2009. From the Cover: Directed, efficient, and versatile modifications of the *Drosophila* genome by genomic engineering. *Proc Natl Acad Sci U S A* 106, 8284-8289.
- Jordan, P., Karess, R., 1997. Myosin light chain-activating phosphorylation sites are required for oogenesis in *Drosophila*. *J Cell Biol* 139, 1805-1819.
- Martin, A.C. et al., 2009. Pulsed contractions of an actin-myosin network drive apical constriction. *Nature* 457, 495-499.
- Royou, A. et al., 2004. Reassessing the role and dynamics of nonmuscle myosin II during furrow formation in early *Drosophila* embryos. *Mol Biol Cell* 15, 838-850.
- Silver, D.L., Montell, D.J., 2001. Paracrine signaling through the JAK/STAT pathway activates invasive behavior of ovarian epithelial cells in *Drosophila*. *Cell* 107, 831-841.
- Tiainen, M. et al., 1999. Growth suppression by Lkb1 is mediated by a G(1) cell cycle arrest. *Proc Natl Acad Sci U S A* 96, 9248-9251.
- Viktorinová, I. et al., 2009. The cadherin Fat2 is required for planar cell polarity in the *Drosophila* ovary. *Development* 136, 4123-4132.
- Winter, C.G. et al., 2001. *Drosophila* Rho-associated kinase (Drok) links Frizzled-mediated planar cell polarity signaling to the actin cytoskeleton. *Cell* 105, 81-91.
